# Supplementary material for: Time is of the essence when treating necrotizing soft tissue infections: a systematic review and meta-analysis
Source: PubMed Central journal article supplement (PMC6950871; doi:10.1186/s13017-019-0286-6), 2020-01-08

# Additional file 4 Forrest plots for all (subgroup) analyses assessing surgical timing in relation to mortality and amputation due to necrotizing soft tissue infections

## Surgery within 6 hours after presentation - mortality as outcome

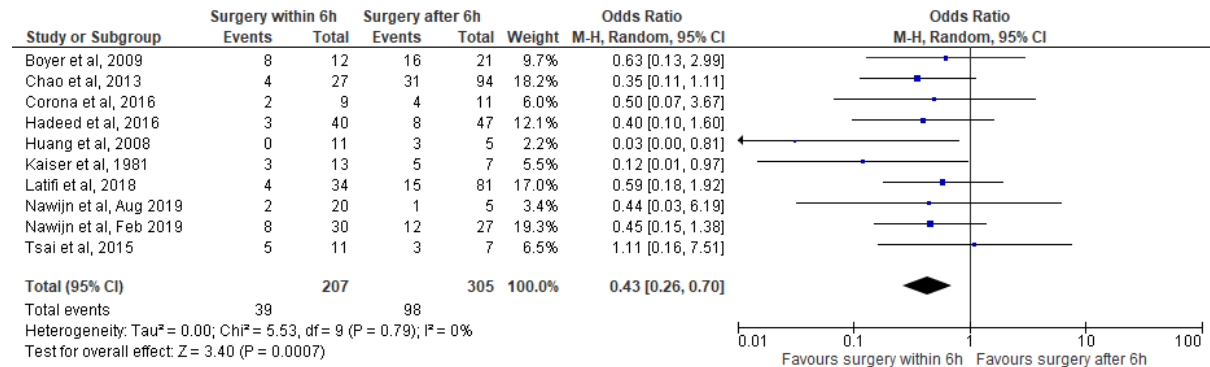

### Subgroup analysis: High-quality studies

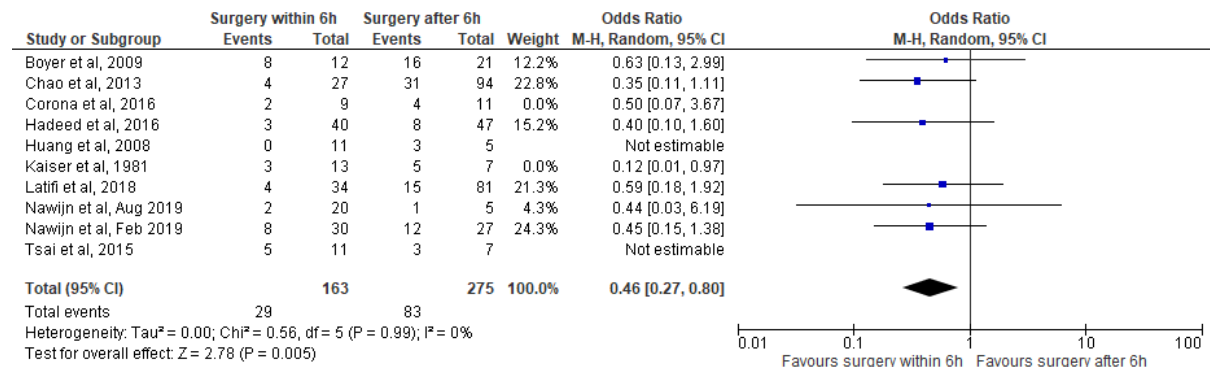

### Subgroup analysis: Studies published ≥2009

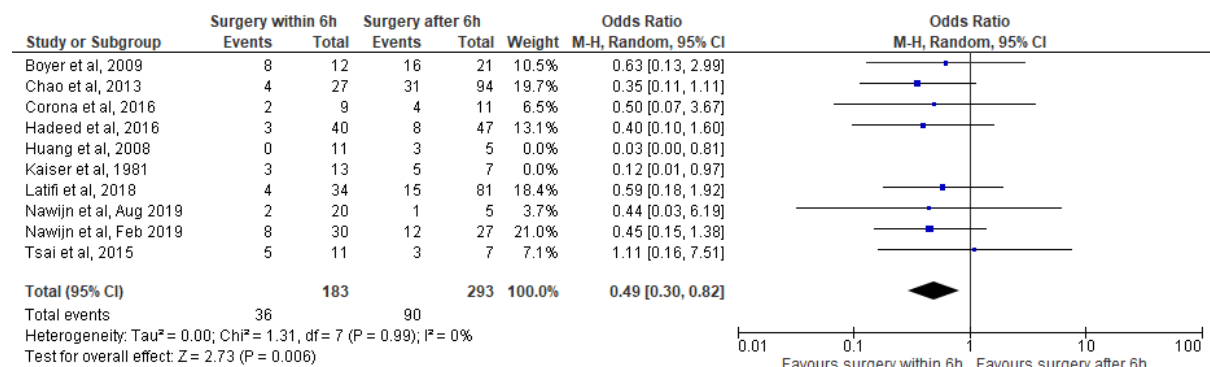

### Subgroup analysis: Studies without limitation on affected body region by NSTI

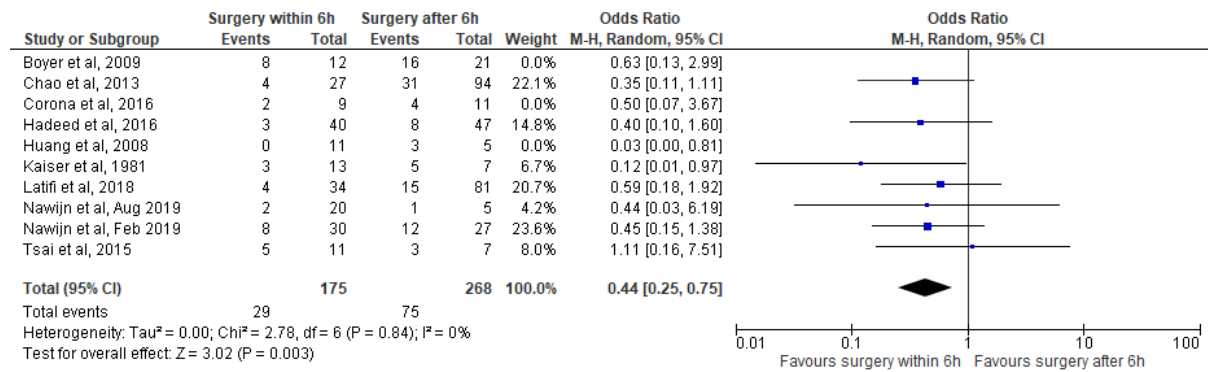

### Subgroup analysis: Excluding studies limited to specific microbial types of NSTI

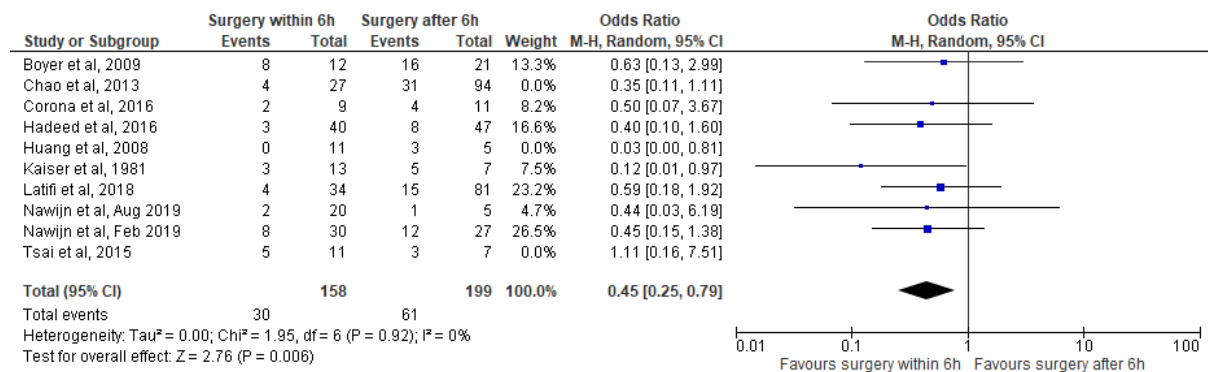

## Surgery within 6 hours after presentation - amputation as outcome

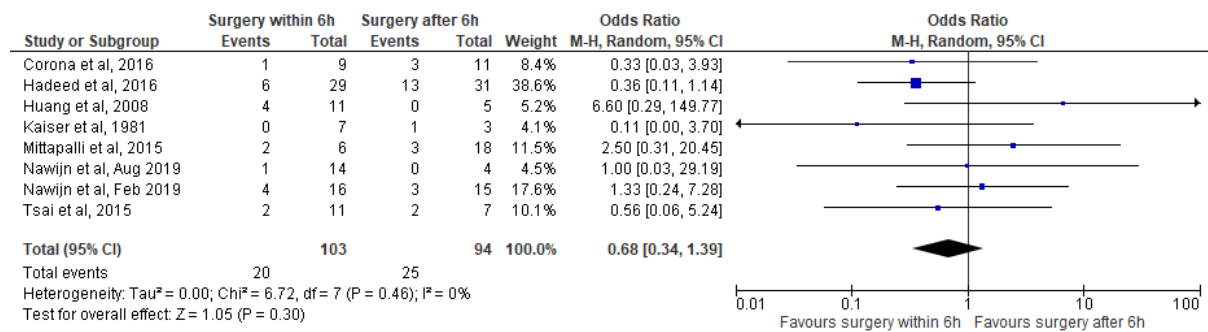

### Subgroup analysis: High-quality studies

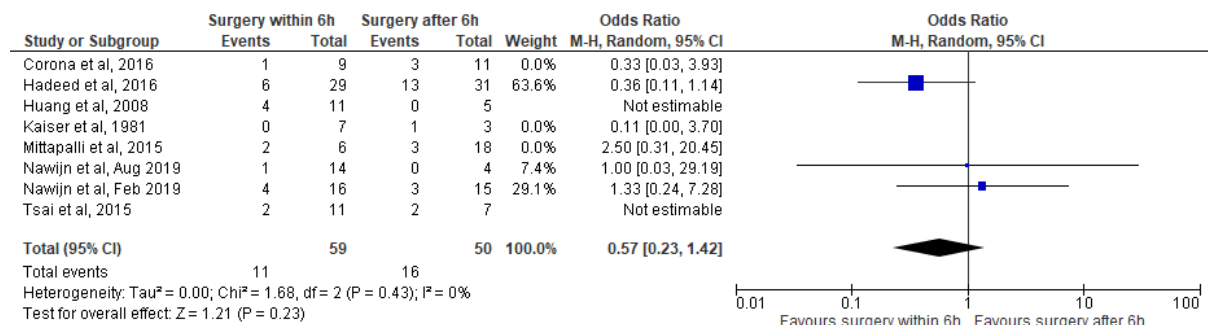

### Subgroup analysis: Studies published ≥2009

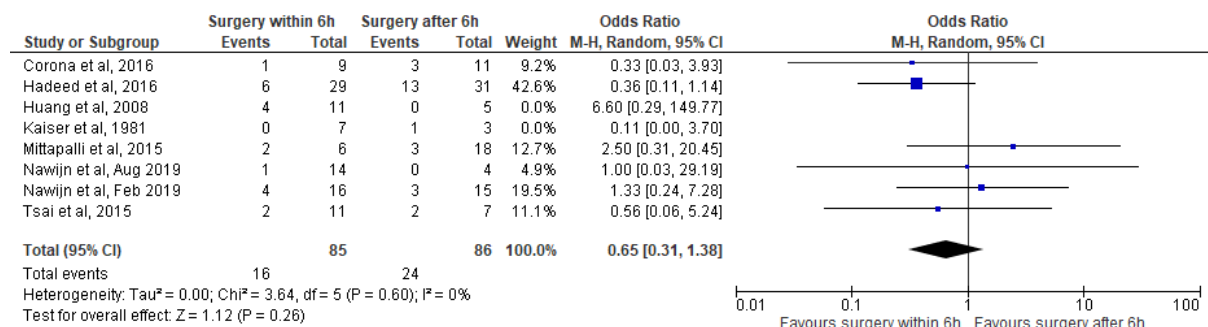

### Subgroup analysis: Studies without limitation on affected body region by NSTI

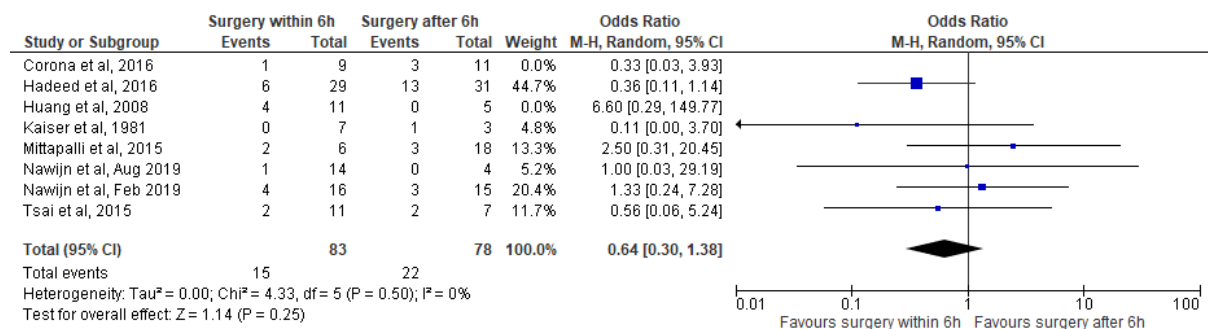

**Subgroup analysis: Excluding studies limited to specific microbial types of NSTI**

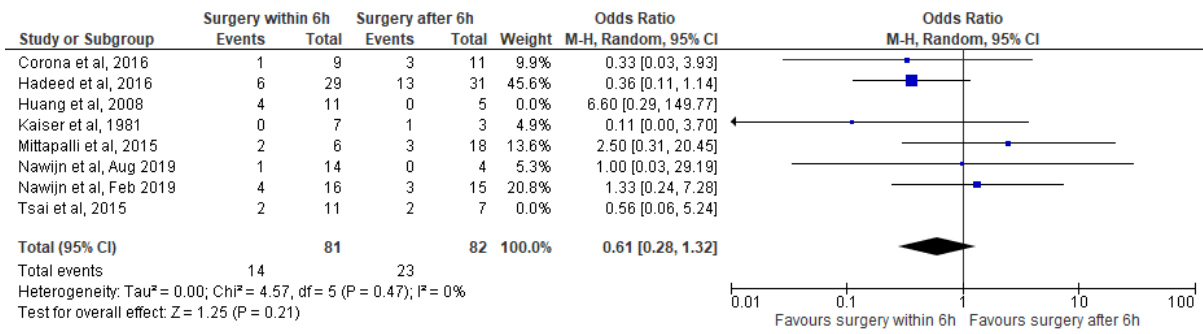

# Surgery within 12 hours after presentation - mortality as outcome

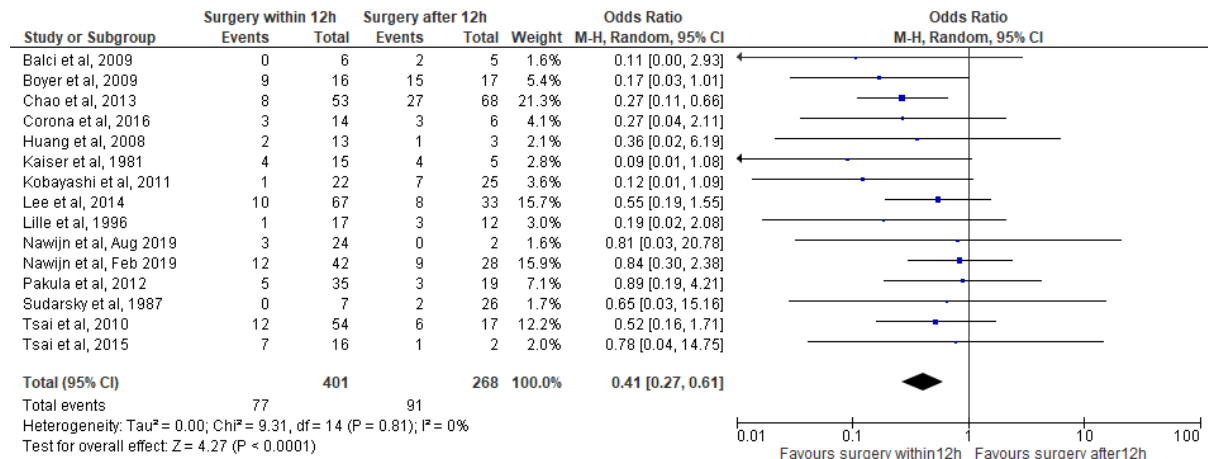

## Subgroup analysis: High-quality studies

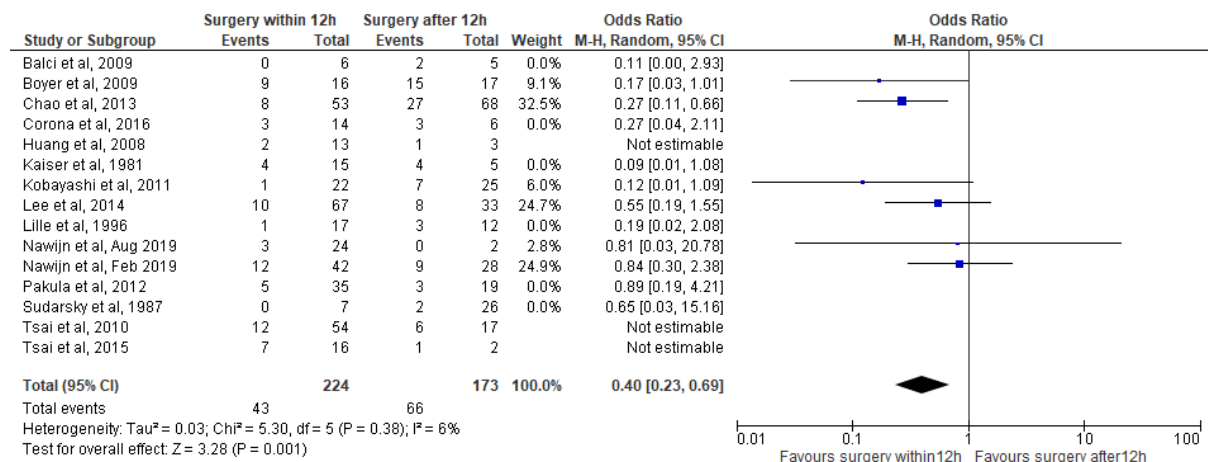

## Subgroup analysis: Studies published ≥2009

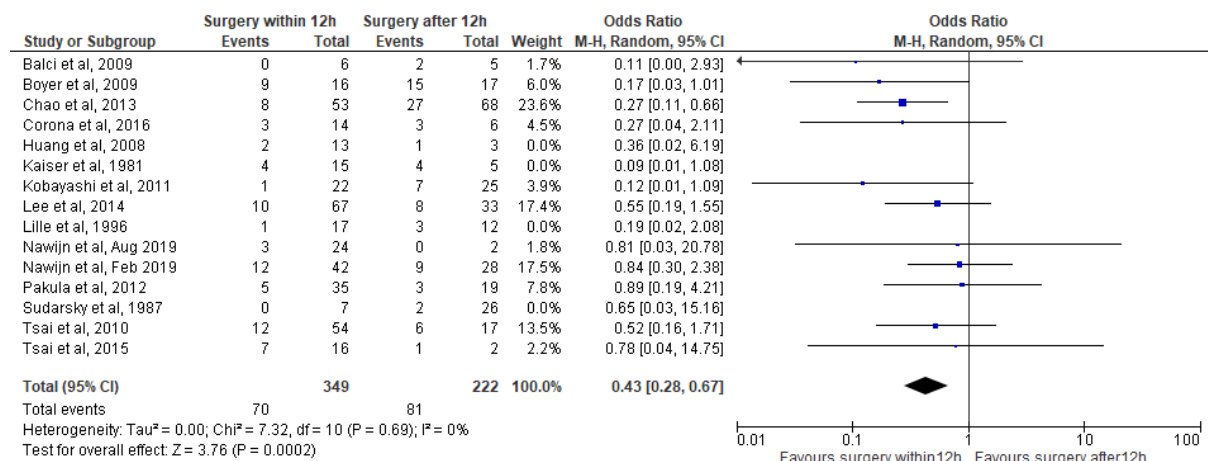

### Subgroup analysis: Studies without limitation on affected body region by NSTI

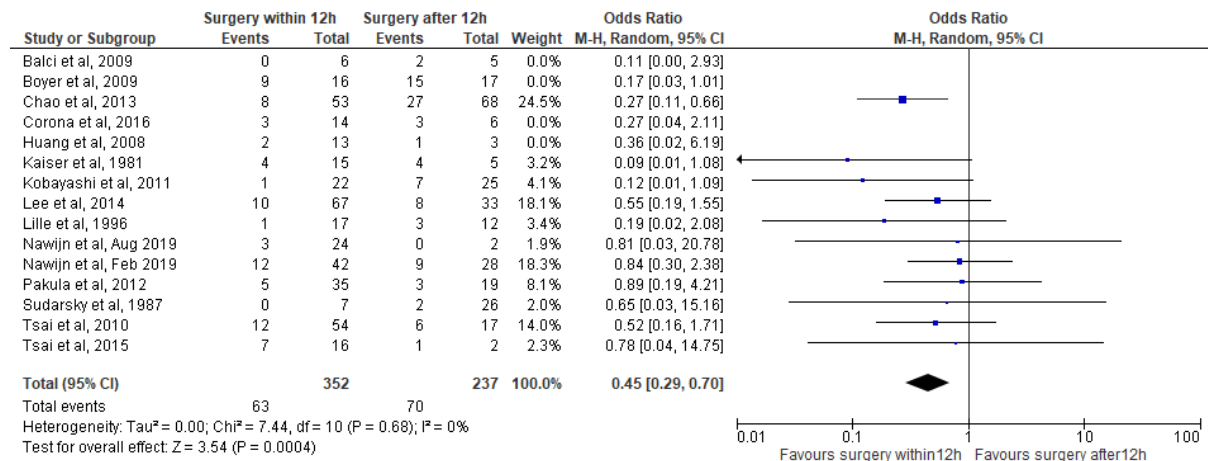

### Subgroup analysis: Excluding studies limited to specific microbial types of NSTI

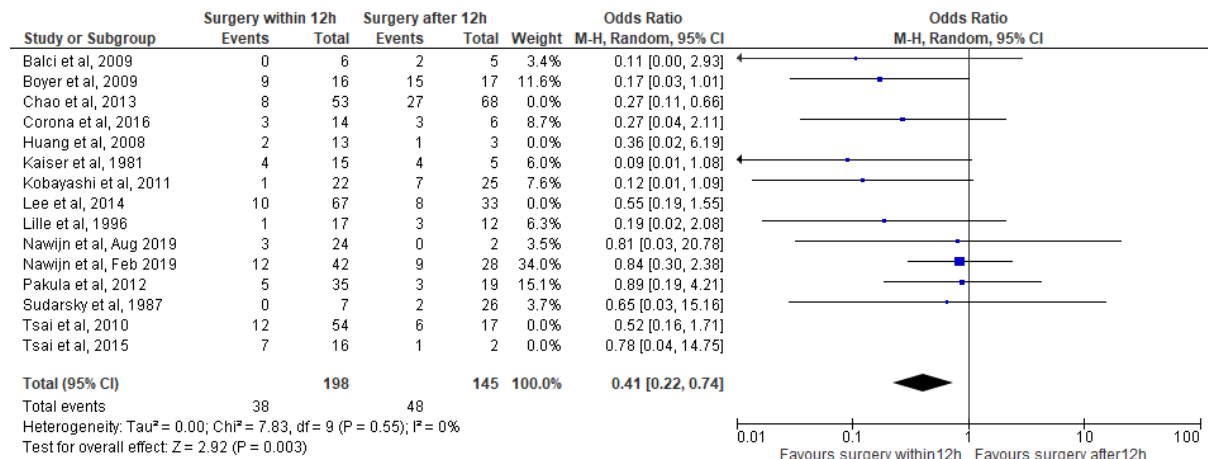

# Surgery within 12 hours after presentation - amputation as outcome

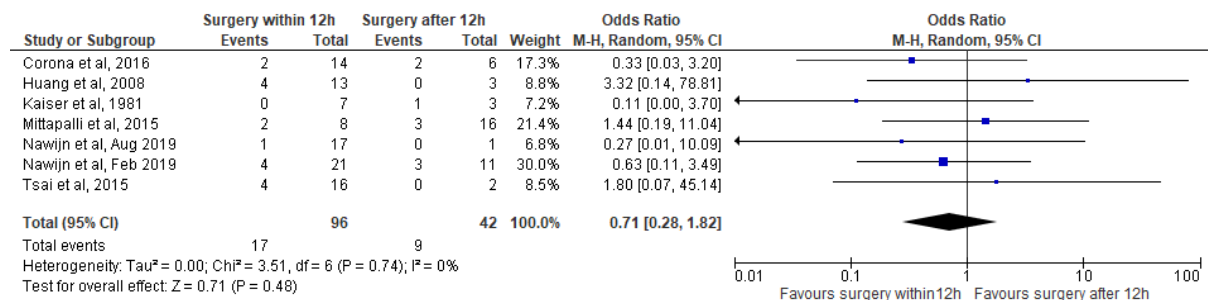

## Subgroup analysis: High-quality studies

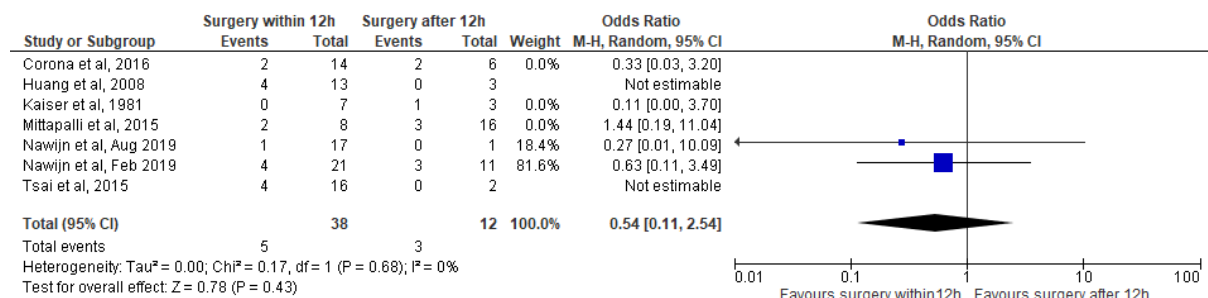

## Subgroup analysis: Studies published ≥2009

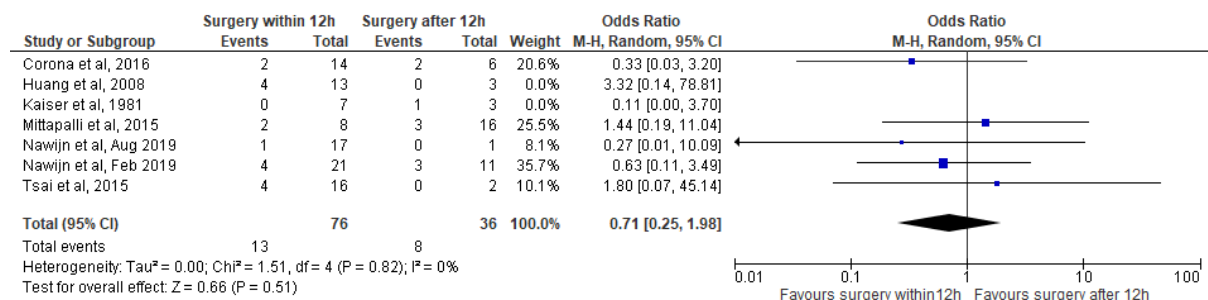

## Subgroup analysis: Studies without limitation on affected body region by NSTI

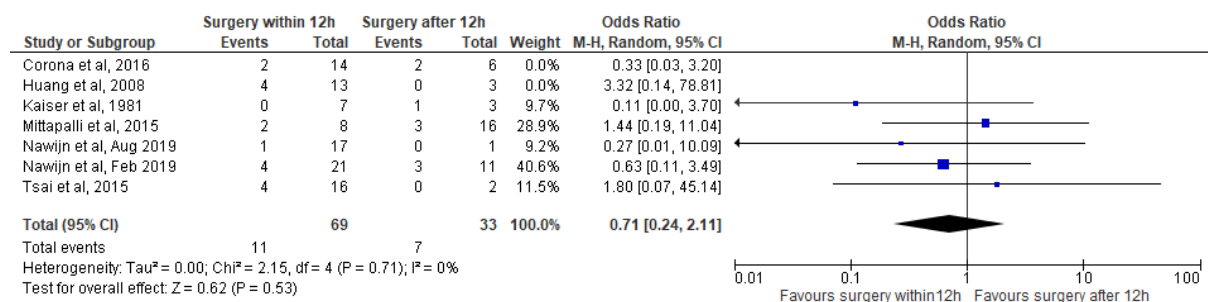

**Subgroup analysis: Excluding studies limited to specific microbial types of NSTI**

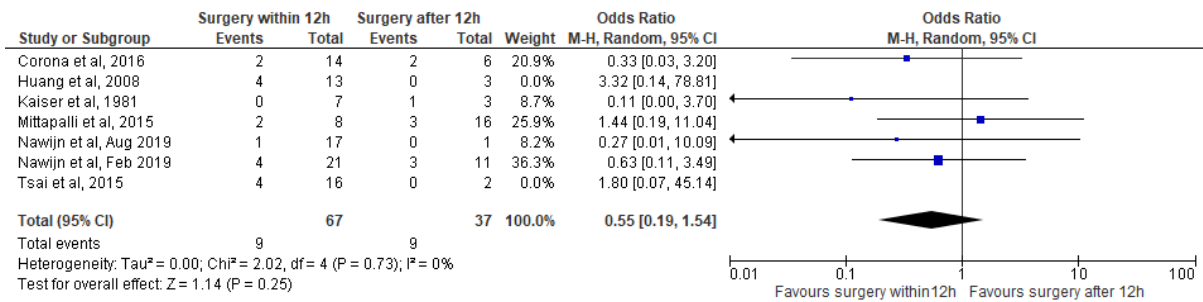



# Surgery within 24 hours after presentation - mortality as outcome

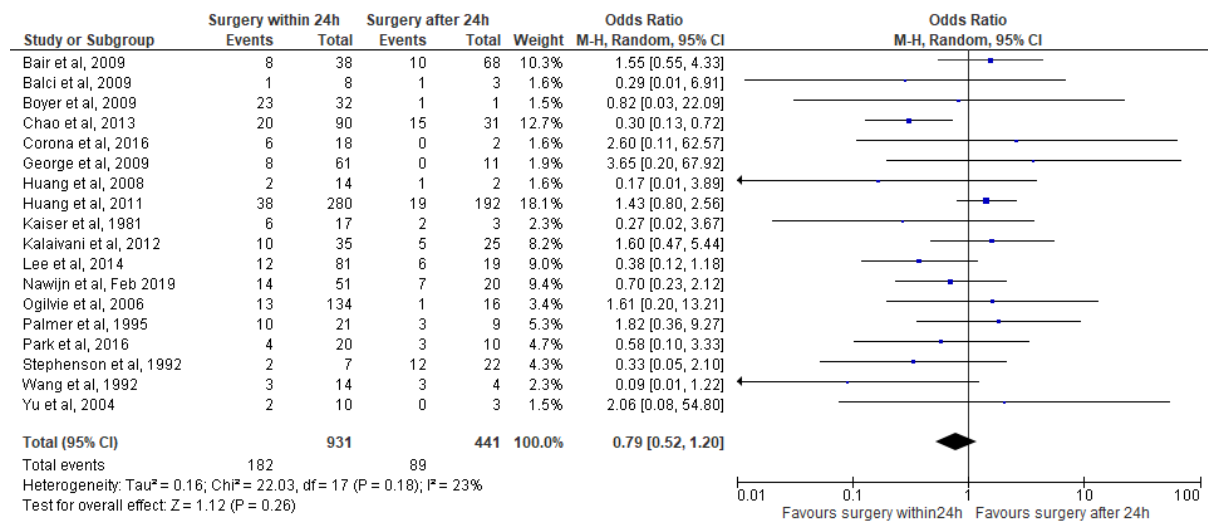

## Subgroup analysis: High-quality studies

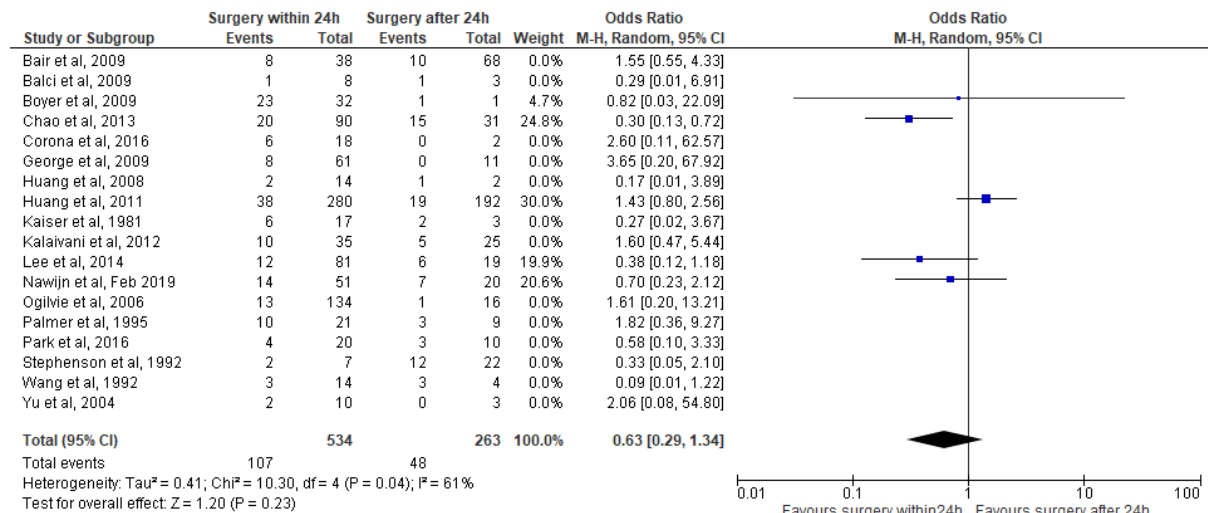

## Subgroup analysis: Studies published ≥2009

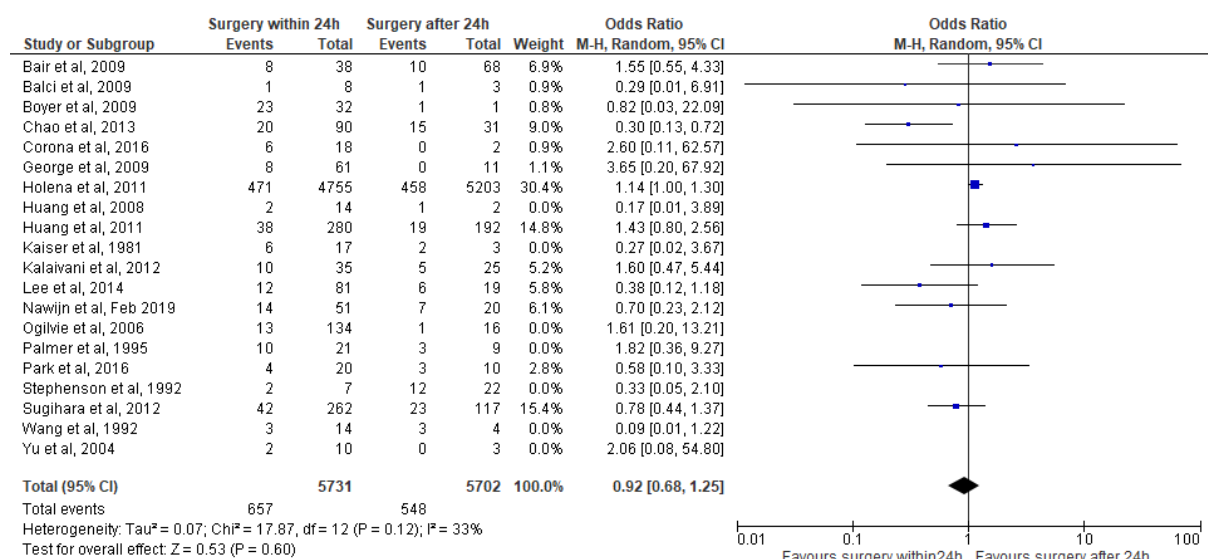

### Subgroup analysis: Studies without limitation on affected body region by NSTI

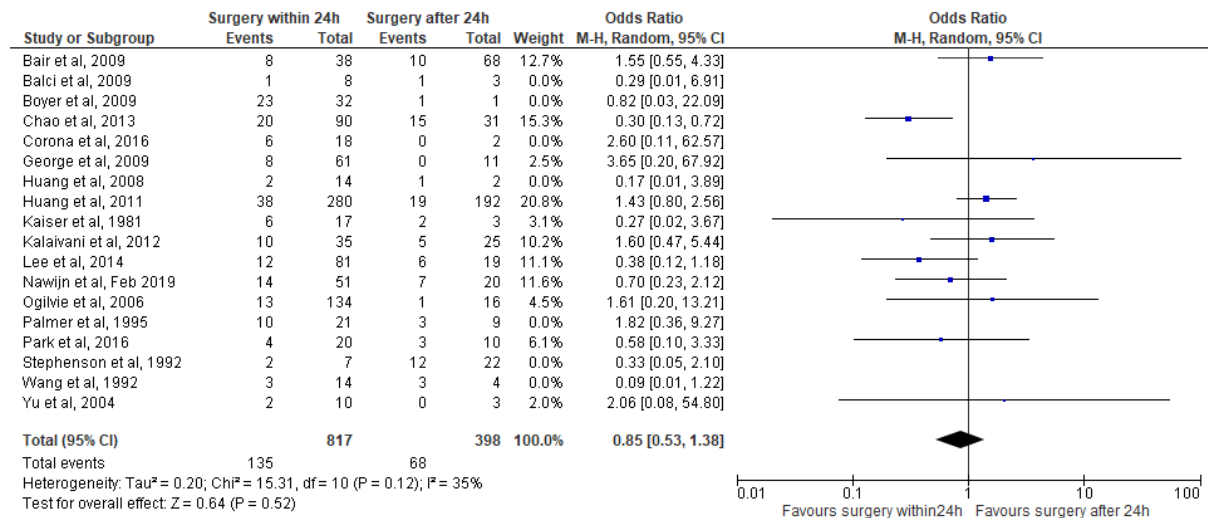

### Subgroup analysis: Excluding studies limited to specific microbial types of NSTI

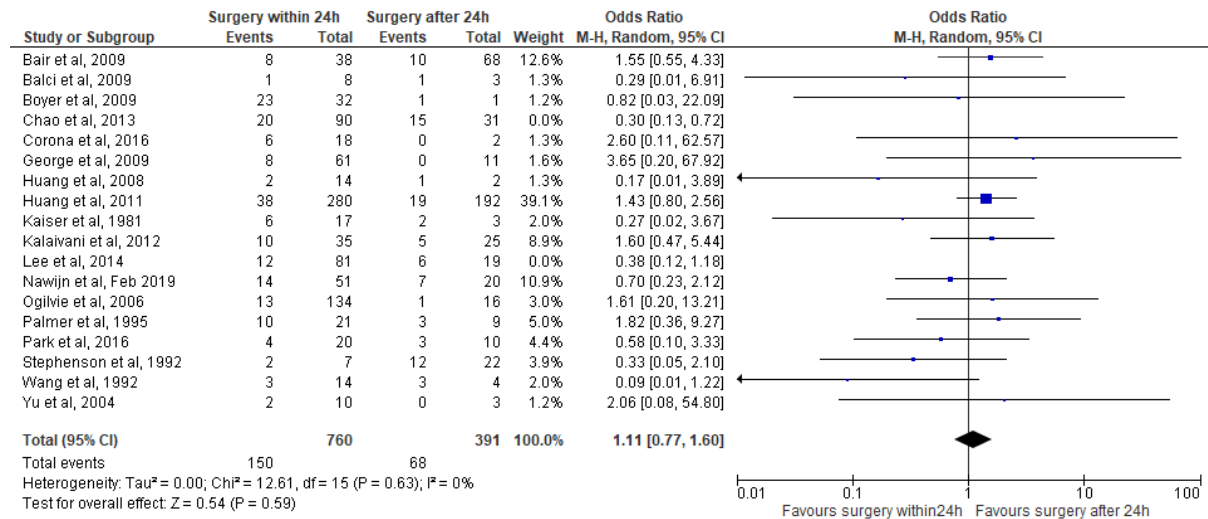

## Surgery within 24 hours after presentation - amputation as outcome

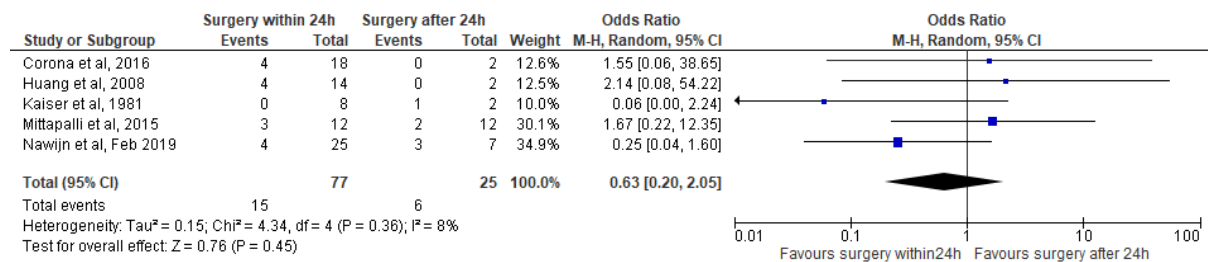

### Subgroup analysis: High-quality studies

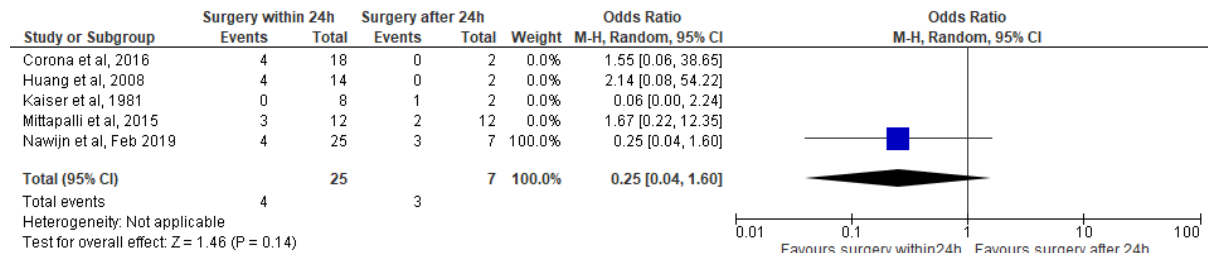

### Subgroup analysis: Studies published ≥2009

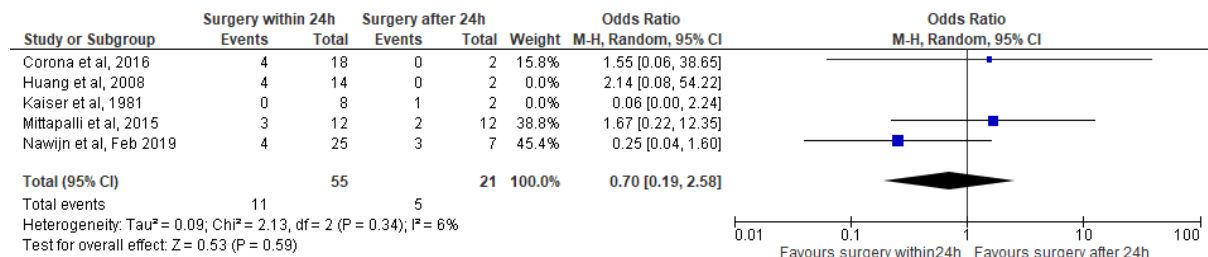

### Subgroup analysis: Studies without limitation on affected body region by NSTI

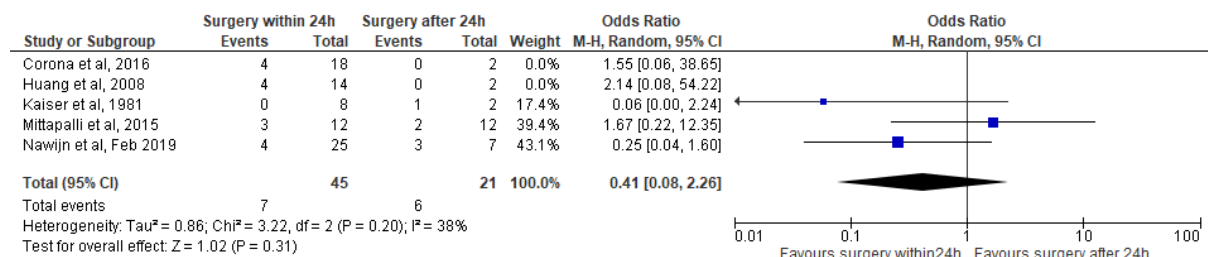

### Subgroup analysis: Excluding studies limited to specific microbial types of NSTI

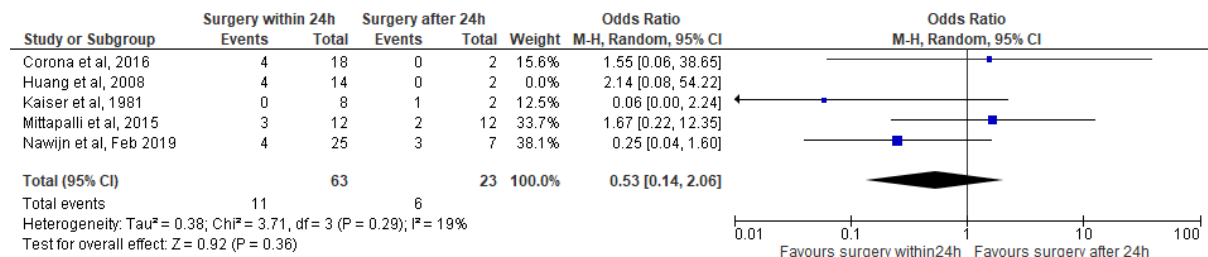

# Surgery within 3 days after onset symptoms - mortality as outcome

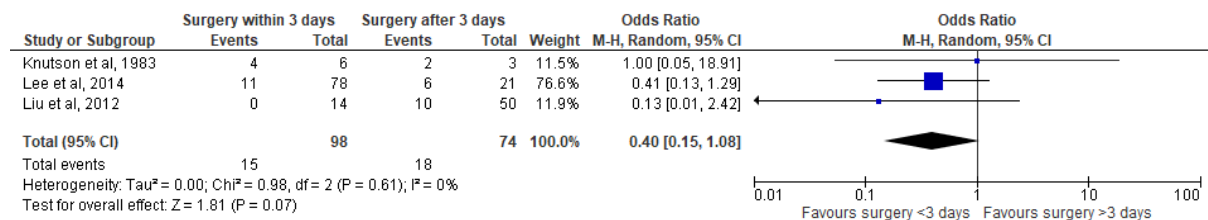

## Subgroup analysis: High-quality studies

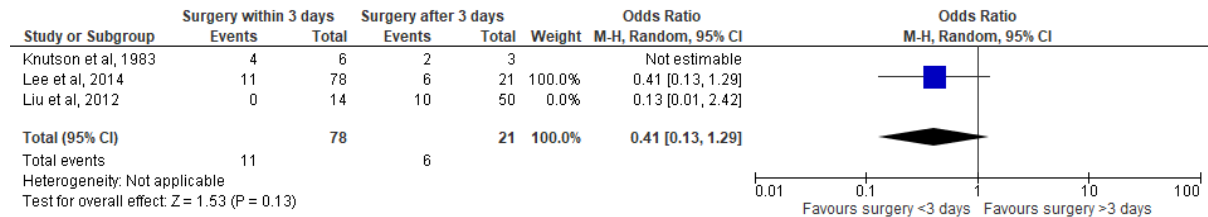

## Subgroup analysis: Studies published ≥2009

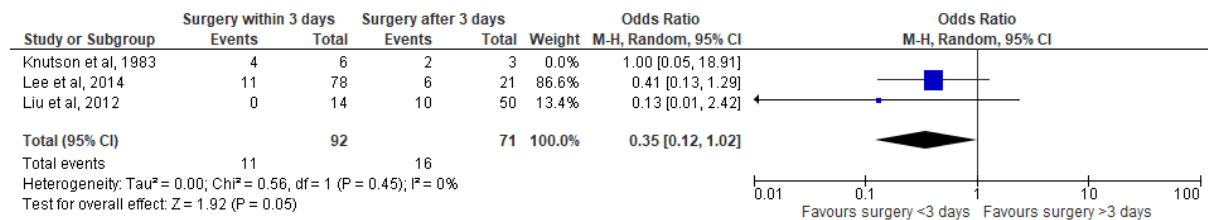

## Subgroup analysis: Studies without limitation on affected body region by NSTI

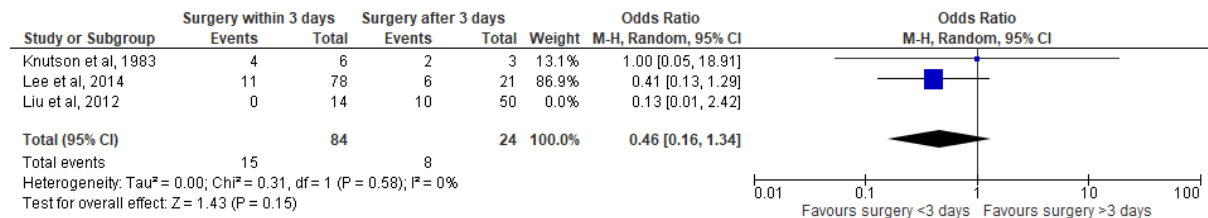

## Subgroup analysis: Excluding studies limited to specific microbial types of NSTI

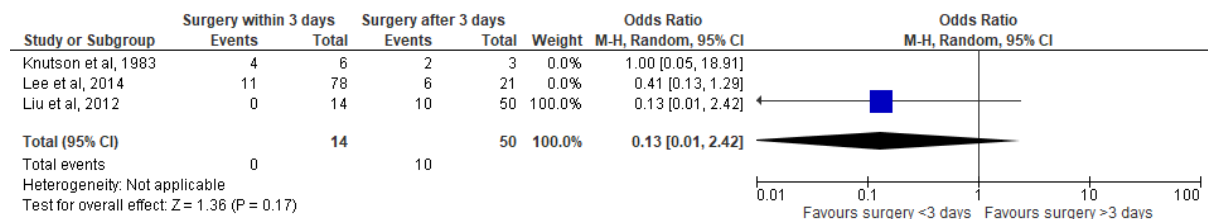

# Hospital presentation within 3 days after onset symptoms - mortality as outcome

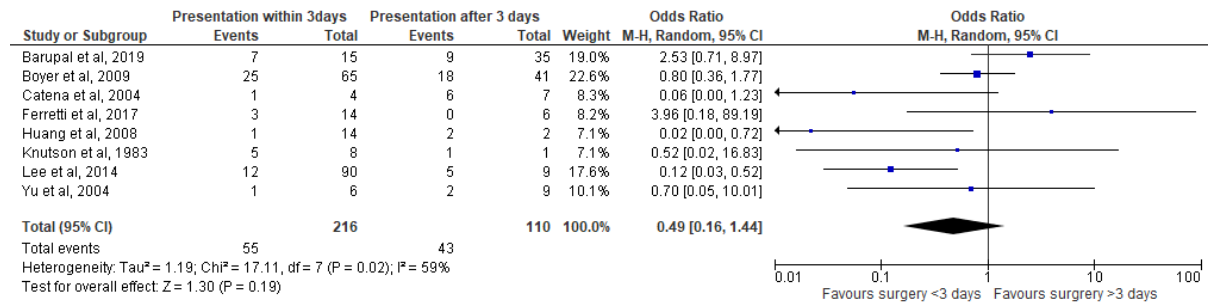

## Subgroup analysis: High-quality studies

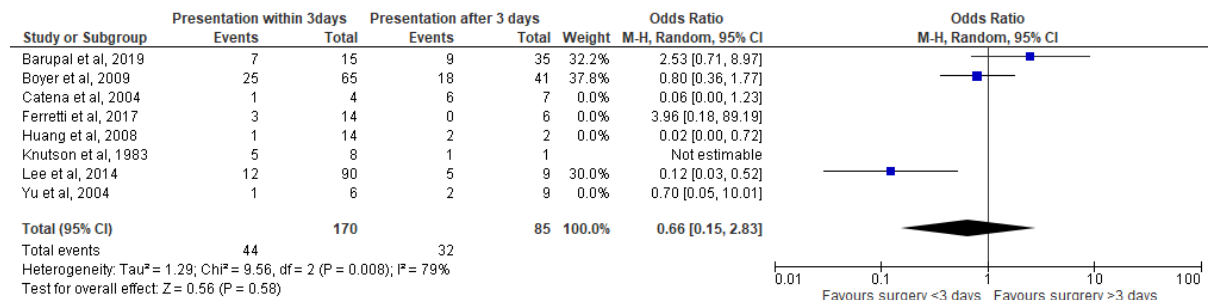

## Subgroup analysis: Studies published ≥2009

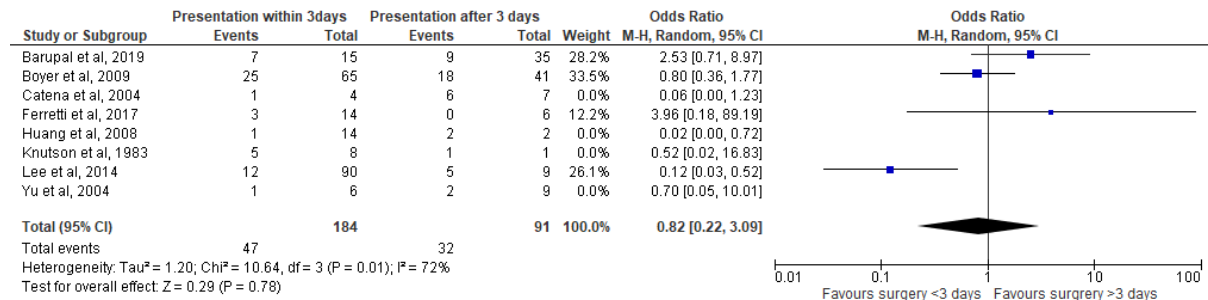

## Subgroup analysis: Studies without limitation on affected body region by NSTI

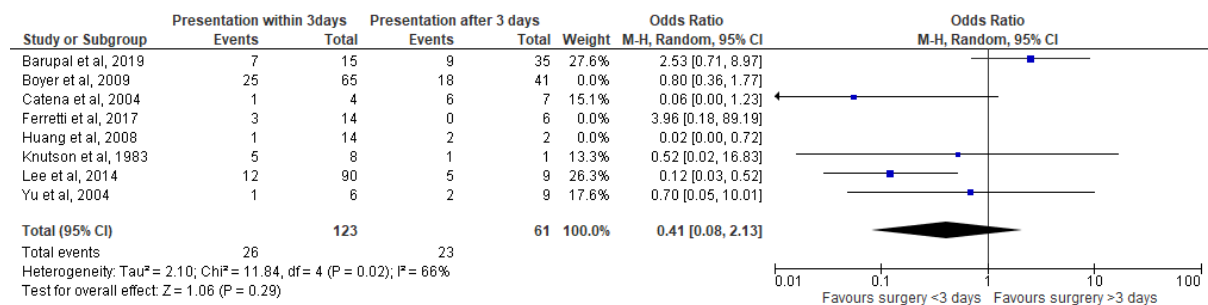

**Subgroup analysis: Excluding studies limited to specific microbial types of NSTI**

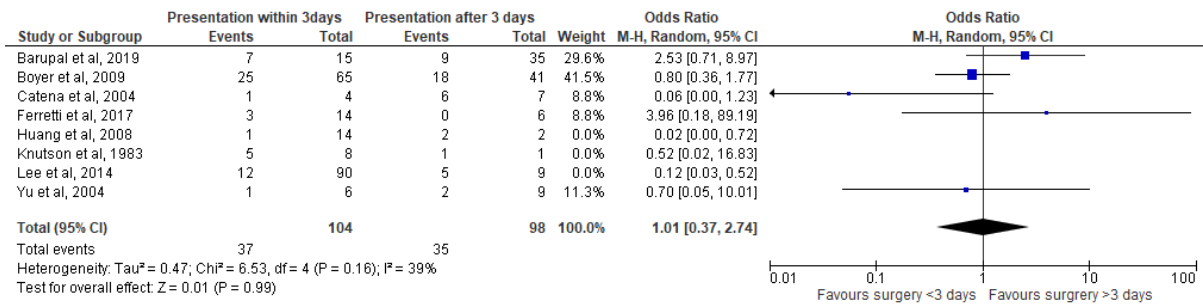

Supplement: 13017_2019_286_MOESM4_ESM.pdf [file 13017_2019_286_MOESM4_ESM.pdf]
