# Supplementary material for: Time is of the essence when treating necrotizing soft tissue infections: a systematic review and meta-analysis
Source: PubMed Central journal article supplement (PMC6950871; doi:10.1186/s13017-019-0286-6), 2020-01-08
Supplement: 13017_2019_286_MOESM5_ESM.pdf [file 13017_2019_286_MOESM5_ESM.pdf]

**Additional file 5 Results from quality assessment of articles included in meta-analyses assessing surgical timing in relation to mortality and amputation due to necrotizing soft tissue infections**

| Study                  | Prospective collection of data | Inclusion and exclusion criteria | Diagnostic criteria used | Definition of the outcome | Total |
|------------------------|--------------------------------|----------------------------------|--------------------------|---------------------------|-------|
| Bair et al. 2009       | 1                              | 1                                | 2                        | 1                         | 5     |
| Balci et al. 2018      | 1                              | 1                                | 2                        | 1                         | 5     |
| Barupal et al. 2019    | 2                              | 2                                | 1                        | 2                         | 7     |
| Boyer et al. 2009      | 1                              | 2                                | 2                        | 2                         | 7     |
| Catena et al. 2004     | 0                              | 1                                | 0                        | 0                         | 1     |
| Chao et al. 2013       | 1                              | 2                                | 2                        | 2                         | 7     |
| Corona et al. 2016     | 1                              | 1                                | 2                        | 1                         | 5     |
| Ferretti et al. 2017   | 1                              | 1                                | 0                        | 0                         | 2     |
| George et al. 2009     | 1                              | 1                                | 0                        | 2                         | 4     |
| Hadeed et al. 2016     | 1                              | 1                                | 2                        | 2                         | 6     |
| Huang et al. 2008      | 0                              | 1                                | 2                        | 1                         | 4     |
| Huang et al. 2011      | 1                              | 1                                | 2                        | 2                         | 6     |
| Kaiser et al. 1981     | 1                              | 1                                | 0                        | 0                         | 2     |
| Kalaivani et al. 2012  | 1                              | 1                                | 1                        | 1                         | 4     |
| Knutson et al. 1983    | 0                              | 2                                | 2                        | 0                         | 4     |
| Kobayashi et al. 2011  | 1                              | 1                                | 2                        | 2                         | 6     |
| Latifi et al. 2018     | 1                              | 2                                | 2                        | 2                         | 7     |
| Lee et al. 2014        | 1                              | 1                                | 2                        | 2                         | 6     |
| Lille et al. 1996      | 1                              | 2                                | 2                        | 0                         | 5     |
| Liu et al. 2012        | 1                              | 1                                | 0                        | 1                         | 3     |
| Mittapalli et al. 2015 | 1                              | 2                                | 0                        | 2                         | 5     |
| Nawijn et al. Aug 2019 | 2                              | 2                                | 2                        | 2                         | 8     |
| Nawijn et al. Feb 2019 | 1                              | 2                                | 2                        | 2                         | 7     |
| Ogilvie et al. 2006    | 1                              | 1                                | 2                        | 1                         | 5     |
| Pakula et al. 2012     | 1                              | 1                                | 2                        | 1                         | 5     |
| Palmer et al. 1995     | 0                              | 1                                | 0                        | 1                         | 2     |
| Park et al. 2016       | 1                              | 1                                | 0                        | 2                         | 4     |
| Stephenson et al. 1992 | 1                              | 2                                | 0                        | 0                         | 3     |
| Sudarsky et al. 1987   | 1                              | 1                                | 2                        | 0                         | 4     |
| Tsai et al. 2010       | 1                              | 1                                | 0                        | 2                         | 4     |
| Tsai et al. 2015       | 1                              | 2                                | 2                        | 0                         | 5     |
| Wang et al. 1992       | 1                              | 1                                | 2                        | 0                         | 4     |
| Yu et al. 2004         | 1                              | 1                                | 0                        | 0                         | 2     |
