# Supplementary material for: Time is of the essence when treating necrotizing soft tissue infections: a systematic review and meta-analysis
Source: World J Emerg Surg. 2020 Jan 8;15:4. doi: 10.1186/s13017-019-0286-6 (PMC6950871; doi:10.1186/s13017-019-0286-6)
Supplement: Supplementary file 2 — Additional file 2: Quality assessment tool for systematic review assessing surgical timing in relation to mortality and amputation due to necrotizing soft tissue infections. [file 13017_2019_286_MOESM2_ESM.pdf]

## Additional file 2 Quality assessment tool for systematic review assessing surgical timing in relation to mortality and amputation due to necrotizing soft tissue infections

| Points | Prospective collection of data | Inclusion and exclusion criteria                              | Diagnostic criteria for necrotizing soft tissue infections used                 | Definition of the outcome                                                                                                                                        |
|--------|--------------------------------|---------------------------------------------------------------|---------------------------------------------------------------------------------|------------------------------------------------------------------------------------------------------------------------------------------------------------------|
| 2      | Prospective                    | Inclusion and exclusion criteria are adequately described     | Macroscopic findings fascia, histopathology results and/or microbiology results | A clear definition of outcome is provided, including duration of follow-up period                                                                                |
| 1      | Retrospective                  | Unclear or poor described inclusion and/or exclusion criteria | Only clinical signs                                                             | A definition of outcome is provided without reporting duration of follow-up period (including “in-hospital mortality” without reporting length of hospital stay) |
| 0      | Not reported                   | Not reported                                                  | Not reported                                                                    | Not reported                                                                                                                                                     |
