# Supplementary material for: Time is of the essence when treating necrotizing soft tissue infections: a systematic review and meta-analysis
Source: World J Emerg Surg. 2020 Jan 8;15:4. doi: 10.1186/s13017-019-0286-6 (PMC6950871; doi:10.1186/s13017-019-0286-6)
Supplement: Supplementary file 3 — Additional file 3: Extracted data from eligible studies assessing surgical timing related to mortality and amputation due to necrotizing soft tissue infection. [file 13017_2019_286_MOESM3_ESM.xlsx]

## Sheet: Eligible studies
Additional file 3 Extracted data from eligible studies assessing surgical timing related to mortality and amputation due to necrotizing soft tissue infection
STUDIES INCLUDED IN META-ANALYSES														MORTALITY OUTCOMES						AMPUTATION OUTCOMES
			PC = Prospective cohort RC = Retrospective cohort RCT = Randomized Controlled Trail NR = Not Reported	NR = Not Reported	NR = Not Reported		CT = Computed Tomography ED = Emergency Department FG = Fournier's Gangrene ICU = Intensive Care Unit NF = Necrotizing Fasciitis NSTI = Necrotizing Soft Tissue Infection SNSTD = Severe Necrotizing Soft Tissue Disease	ED = Emergency Department FG = Fournier's Gangrene ICU = Intensive Care Unit NF = Necrotizing Fasciitis NR = Not Reported NSTI = Necrotizing Soft Tissue Infection	CT = Computed Tomography FG = Fournier's Gangrene NF = Necrotizing Fasciitis NR = Not Reported NSTI = Necrotizing Soft Tissue Infection	NR = Not Reported	NR = Not Reported SD = Standard Deviation	IQR = Interquartile Range NR = Not Reported		LOHS = Length Of Hospital Stay NR = Not Reported NS = Not Specified		H = hours IQR = Interquartile Range NR = Not Reported	H = Hours NR = Not Reported	H = hours NR = Not Reported	NR = Not Reported	NA = Not Applicable NR = Not Reported	NA = Not Applicable NR = Not Reported	NA = Not Applicable NR = Not Reported	NA = Not Applicable NR = Not Reported
First author	Year of publication	Country in which study is performed	Study design	Inclusion period	Number of institutions included	Number of included patients	Inclusion criteria	Exclusion criteria	Diagnostic criteria	Way of confirming SNSTD	Mean age ± SD	Median age (IQR)	Body regions assessed	Definition of mortality used	Mortality (cohort)	Outcome: Onset symptoms to admission/presentation	Outcome: Onset symptoms to surgery	Outcome: Presentation/diagnosis to surgery	Outcome: Duration of initial debridement	Amputation of whole cohort regardless of location NSTI	Amputation in case of NSTI of the extremity	Outcome: Onset symptoms to admission/presentation	Outcome: Presentation/diagnosis to surgery
Bair	2009	Taiwan	RC	1995-2006	1	106	Patients admitted with a diagnosis of NF	NR	Diagnoses were made via operation and based on the presence of subcutaneous necrotic tissue extending through the fascial planes. Histopathological examinations of surgical specimens were used to confirm the diagnoses when available	Operative, histopathology	58.2 ± 14.2	NR	Full body	NS	17% (18/106)	NR	NR	Time diagnosis to surgery Total: Mean 60.4h ± 55.6 (n = 106) Survived: Mean 64.2h ± 58.2 (n = 88) Deceased: Mean 41.6h ± 36.6 (n = 18) (p = 0.039) <24h: Total 35.8% (38/106), 34% of the survivors (30/88) and 44% of the deceased (8/18) (p = 0.40)	NR	4.7% (5/106)	5.5% (5/91)	NR	Time diagnosis to surgery Total: Mean 60.4h ± 55.6 (n = 106)
Balci	2018	Turkey	RC	2008-2017	1	11	Patients who were treated for head and neck NF	NR	The diagnosis of NF was made according to clinical and CT scan findings and the diagnosis was histologically confirmed by necrosis of the fascia and subcutaneous tissue	Histopathology	57.1 ± 9.9	NR	Head/Neck	NS	18.2% (2/11)	NR	NR	Time admission to surgery <12h: Total 54.5% (6/11), 66% of the survivors (6/9) and 0% of the deceased (0/2) 12-24h: Total 18.2% (2/11), 11% of the survivors (1/9) and 50% of the deceased (1/2) 24h-48h: Total 18.2% (2/11), 11% of the survivors (1/9) and 50% of the deceased (1/2) >48h: Total 9.1% (1/11), 11% of the survivors (1/9) and 0% of the deceased (0/2)	NR	NA	NA	NA	NA
Barupal	2019	India	PC	2014-2016	1	50	All patients between the age of 15 and 90 years presenting at the outpatient department with NSTI irrespective of the etiology were included	Patients outside the age group, those with a history of previous surgical intervention for NSTI elsewhere and seeking further management at our hospital or patients admitted for other indications and who developed NSTI during the course of their treatment were excluded	The diagnosis was confirmed in the presence of fever, soft-tissue involvement with significant pain (out of proportion to skin findings), signs of toxicity, crepitus, and rapid progression of clinical manifestations along with positive pus cultures and characteristic findings on soft-tissue X-rays. The diagnosis was further established at the time of surgical exploration	Operative, microbiology	50.8 ± 17.1	NR	Full body	In-hospital mortality rate (LOHS: mean 13.0 days ± 10.4)	32% (16/50)	Time onset symptoms to presentation ≤3 days: Total 30% (15/50), 23.5% of the survivors (8/34) and 43.8% of the deceased (7/16) 4-7 days: Total 48% (24/50), 55.9% of the survivors (19/34) and 31.3% of the deceased (5/16) >7 days: Total 22% (11/50), 20.6% of the survivors (7/34) and 25% of the deceased (4/16)	NR	Time admission to surgery Total: Mean 5.5 ± 3.5 (n = 50) Survivors: Mean 5.7 ± 3.1 (n = 34) Deceased: Mean 10.5 ± 14.0 (n = 16) (p = 0.449)	NR	2% (1/50)	12.5% (1/8)	Time onset symptoms to presentation ≤3 days: Total 30% (15/50) 4-7 days: Total 48% (24/50) >7 days: Total 22% (11/50)	Time admission to surgery Total: Mean 5.5 ± 3.5 (n = 50)
Boyer	2009	France	RC	1996-2004	1	106	All patients admitted to the ICU who were diagnosed with perianal, genital, perineal, abdominal, or limb NSTI.	Patients with facial, cervical, or trunk NSTI	The diagnosis was confirmed by means of medical history, physical examination which revealed the presence of necrosis of subcutaneous tissue and fascia with irregular involvement of the skin and muscles, and finally histological or operative anatomic confirmation	Operative, histopathology	58 ± 16	NR	Full body excluding facial, cervical, trunk	In-hospital mortality rate (LOHS: Mean 9 days)	40.6% (43/106)	Time onset symptoms to diagnosis Total: Median 72h (24 - 168h) (n = 99) Survived: 64% diagnosed ≤ 72h Deceased: 57% diagnosed ≤ 72h (p > 0.45) >72h: 43% (43/99) (p >0.45)	NR	Time diagnosis to surgery Total: Mean 9h (3.8 - 16.5h) (n = 80) Survived: 45% diagnosed ≤ 9h Deceased: 56% diagnosed ≤ 9h (p > 0.15)	NR	12% (13/106)	30% (13/44)	Time onset symptoms to diagnosis Total: Median 72h (24 - 168h) (n = 99)	Time diagnosis to surgery Total: Mean 9h (3.8 - 16.5h) (n = 80)
Catena	2004	Italy	NR	1995-2001	1	11	Cases of NF	NR	NR	NR	55.4	NR	Full body	In-hospital mortality rate (LOHS: NR)	63.6% (7/11)	Time onset symptoms to admission Total: Mean 5.4 days (n = 11) Survived: Mean 2 days (n = 4) Deceased: Mean 7.3 days (n = 7) (p <0.05)	NR	NR	NR	NR	NR	NR	NR
Chao	2013	Taiwan	RC	1998-2011	1	121	Patients with V vulnificus–related NF involving the upper and lower extremities	Patients who decided against surgical treatment and were transferred to another medical center	The diagnosis of NF was based on lesion changes indicative of necrosis and histopathologic confirmation and the recovery of V vulnificus from blood or wound cultures	Operative, histopathology, microbiology	65.2 ± 11.6	NR	Full body	In-hospital mortality rate (LOHS: mean 26.9 days ± 16.7)	29% (35/121)	Time onset symptoms to admission Total: Mean 1.3 ± 0.6 days (n = 121) Survived: Mean 1.4 ± 0.7 days (n = 86) Deceased: Mean 1.2 ± 0.5 days (n = 35) (p = 0.127)	NR	Time admission to surgery Total: Mean 17.5h (n = 121) Survived: 14.1h ± 13.9 (n = 86) Deceased: 25.7h ± 15.5 (n = 35) (p <0.001; HR 1.16, 95% CI 1.09-1.22) <12h: Total 43.8% (53/121), 52.3% of the survivors (45/86) and 22.9% of the deceased (8/35) 12-24h: Total 30.6% (37/121), 29.1% of the survivors (25/86) and 34.3% of the deceased (12/35) >24h: Total 25.6% (31/121), 18.6% of the survivors (16/8…	NR	10.7% (13/121)	10.7% (13/121)	Time onset symptoms to admission Total: Mean 1.3 ± 0.6 days (n = 121)	Time admission to surgery Total: Mean 17.5h (n = 121) <12h: Total 43.8% (53/121), 12-24h: Total 30.6% (37/121) >24h: Total 25.6% (31/121)
Corona	2016	Spain	RC	2010-2014	1	20	All adult cases of NF affecting the extremities	NR	The final diagnosis of NF was established based on any of the following intraoperative parameters: lack of resistance to blunt dissection in normally adherent fascia (the so-called "finger test"), surgeon's opinion of presence of necrotic fascia, purulent discharge with aspect of "dirty dishwater" colored fluid, histopathological diagnosis of NF, where samples were available	Operative, histopathology	56.8	NR	Extremities	In-hospital mortality rate (LOHS: NR)	30% (6/20)	NR	NR	Time admission to surgery Total: Mean 11.1h (n = 20) Survived: Mean 9.9h (n = 14) Deceased: Mean 14h (n = 6)	NR	20% (4/20)	20% (4/20)	NR	Time admission to surgery Total: Mean 11.1h (n = 20) Amputated: Mean 13h (n = 4) Salvaged: Mean 10.6h (n = 16)
Ferretti	2017	United States	RC	2009-2016	1	20	FG cases	NR	NR	NR	56	NR	Fournier	In-hospital mortality rate (LOHS: Median 25 days)	15% (3/20)	Time onset symptoms to presentation Total: Median 3 days (range 0 - 14) (n = 20) <3 days: Total 70% (14/20) >3 days: Total 30% (6/20)	NR	Time presentation to surgery Total: Median 1 day (n = 20)	NR	NA	NA	NA	NA
George	2009	United States	RC	1994-2004	2	78	Patients who underwent surgery for NSTIs	NR	NR	NR	49.5 ± 19.6	NR	Full body	In-hospital mortality rate (LOHS: Median 16.5 days (IQR 11 - 28))	10.3% (8/78)	NR	NR	Time presentation to surgery Total: Mean 21.8h ± 21.0 (n = 72) < 24 h: Total 84.7% (61/72), 83% of the survivors (53/64) and 100% of the deceased (8/8) >24h: Total 15.3% (11/72), 17% of the survivors (11/64) and 0% of the deceased (0/8)	NR	NR	NR	NR	NR
Hadeed	2016	United States	RC	2003-2008	1	87	Patients who underwent an operation for NSTIs	NR	This study group included only patients whose diagnosis was confirmed by operative findings revealed by analysis of the electronic medical record.	Operative	46 ± 17	NR	Full body	NS	12.5% (11/87)	NR	NR	Time admission to surgery Total: Median 2h (IQR 2, range 2 - 4) (n = 87) <6h: Total 46% (40/86), 48.7% of the survivors (37/76) and 27.3% of the deceased (3/11) ≥6h: Total 54% (47/87), 51.3% of the survivors (39/76) and 72.7% of the deceased (8/11)	NR	21.8% (19/87)	31.7% (19/60)	NR	Time admission to surgery Total: Median 2h (IQR 2, range 2 - 4) (n = 87) <6h: Total 48% (29/60), 31.6% of the amputees (6/19) and 56.1% of the salvaged limbs (23/41) ≥6h: Total 52% (31/60), 68.4% of the amputees (13/19) and 43.9% of the salvaged limbs (18/41)
Huang	2008	Taiwan	NR	2002-2007	1	16	All patients diagnosed with Vibrio NSTI of an upper extremity	Once these criteria were met, patients were enrolled in this study, and no further inclusion or exclusion criteria were used.	NSTI was defined by either histopathologic or surgical findings such as the presence of necrosis of skin, subcutaneous fat, superficial fascia, or underlying muscle	Operative, histopathology	NR	64	Upper extremity	In-hospital mortality rate (LOHS: Mean 29.4 ± 20.4)	18.8% (3/16)	Time onset symptoms to presentation Total: Mean 2.2 days (n = 16) Survived: Mean 2 days (n = 13) Deceased: Mean 3 days (n = 3)	NR	Time presentation to surgery Total: Mean 11.9h (n = 16) Survived: Mean 7.4h (n = 13) Deceased: Mean 25.7h (n = 3)	NR	25% (4/16)	25% (4/16)	Time onset symptoms to presentation Total: Mean 2.2 days (n = 16) Amputation: Mean 2 days (n = 4) Salvaged: Mean 2.3 days (n = 12)	Time presentation to surgery Total: Mean 11.9h (n = 16) Amputation: Mean 2.5h (n = 4) Salvaged: Mean 15h (n = 12)
Huang	2011	Taiwan	RC	2003-2009	1	472	All patients with a diagnosis of NF	NR	The definitive diagnosis was confirmed by operative findings with the necrosis of the fascia	Operative	59.6 ± 14.3	NR	Full body	Overall mortality rate; 30-day mortality rate	12.1% (57/472); 11.0% (52/472)	NR	NR	Time admission to surgery <24h: Total 59.3% (280/472), 58.3% of the survivors (242/415) and 66.7% of the deceased (38/57) (p = 0.230; OR 0.70, 95% CI 0.39-1.26)	NR	11.9% (56/472)	13.6% (56/413)	NR	Time admission to surgery <24h: Total 59.3% (280/472)
Kaiser	1981	United States	RC	1976-1981	1	20	Progressive necrotizing infections presented to the Surgical ICU	NR	NR	NR	NR	NR	Full body	NS	40% (8/20)	NR	NR	Time presentation to surgery Total: Mean 15.8h (n = 20) Survived: Mean 8.3h (n = 12) Deceased: Mean 27h (n = 8)	NR	5% (1/20)	10% (1/10)	NA	Time admission to surgery Total: Mean 15.8 hours (n =20) Amputation: Mean 48 hours (n = 1) Salvaged: Mean 14.1 hours (n =19)
Kalaivani	2012	India	RC	2007-2011	1	60	All patients with NSTI involving the fascia with or without the skin or muscle necrosis	NR	NSTI was defined by the presence of necrosis of the subcutaneous tissue and fascia with variable involvement of the skin and skin clinically	Clinical signs	46.57 ± 20.60	NR	Full body	NS	25% (15/60)	NR	NR	Time admission to surgery <24h: Total 58.3% (35/60), 55.6% of the survivors (25/45) and 66.7% of the deceased (10/15) >24h: Total 41.7% (25/60), 44.4% for survivors (20/45) and 33.3% for deceased (5/15)(p = 0.0061)	NR	8.3% (5/60)	13.2% (5/38)	NR	Time admission to surgery <24h: Total 58.3% (35/60) >24h: Total 41.7% (25/60)
Knutson	1983	Sweden	NR	NR	1	9	Patients with gas gangrene	Patients without myonecrosis or signs of toxemia.	Microbiology cultures	Microbiology	67.1	NR	Abdomen and extremities	NS	66.7% (6/9)	Time onset symptoms to presentation Total: Median 24h (IQR 13.5 - 39) (n = 9) Survivors: Median 24h (n = 3) Deceased: Median 16.5h (IQR 10.8 - 58.5) (n = 6)	Time onset symptoms to treatment Total: Median 70h (IQR 29 - 85) (n = 9) Survived: Median 70h (n = 3) Deceased: Median 59.5h (IQR 30 - 103.5) (n = 6)	NR	NR	0	0	NR	NR
Kobayashi	2011	United States	RC	2004-2010	1	47	Patients with NSTI	NR	Patients were deemed to have NSTI if there was necrotic tissue at the time of surgery (documented by the operating trauma attending surgeon) or necrotic tissue (fascia or muscle) in pathology specimens	Operative, histopathology	48.3 ± 11.5	NR	Full body	In-hospital mortality rate (LOHS: Mean 69.3 ± 139.4)	17% (8/47)	NR	NR	Time from admission to surgery ≤12h: Total 46.8% (22/47), 53.8% of the survivors (21/39) and 12.5% of the deceased (1/8)	NR	NR	NR	NR	NR
Latifi	2018	United States	RC	2005-2016	1	115	All subjects presenting with NSTI	Patients under the age of 18 or with intraoperative findings not consistent with NSTI diagnosis were excluded	Confirmed by intraoperative findings	Operative	55.15 ± 14.37	NR	Full body	NS	16.5% (19/115)	NR	NR	Time diagnosis to surgery Total: Mean 27.49h (range 0.05-141.07) (n = 115) <6h: Total 29.6% (34/115), 31.3% of the survivors (30/96) and 21.1% of the deceased (4/19) ≥6h: Total 70.4% (81/115), 68.8% of the survivors (66/96) and 78.9% of the deceased (15/19) (p=0.426)	NR	NR	NR	NR	NR
Lee	2014	Taiwan	RC	1996-2011	1	100	Patients with NF caused by laboratory-confirmed V. Vulnificus	NR	The following characteristics at operative exploration were used for definitive diagnosis of NF: presence of grayish necrotic fascia, lack of resistance of normally adherent muscular fascia to blunt dissection, lack of bleeding of the fascia during dissection and the presence of foul-smelling "dishwater" pus. Permanent histopathologic tissue examination was used to confirm the diagnosis when avai…	Operative, histopathology	63.6 ± 13.3	NR	Full body	In-hospital mortality rate (LOHS: mean 28.9 days ± 17.3)	18% (18/100)	Time onset symptoms to presentation Total: Mean 2.1 days (n = 99) Survived: Mean 1.9 ± 0.7 days (range 0 - 4) (n = 82) Deceased: Mean 3.1 ± 2.6 days (range 0 - 9) (n = 17) (p = 0.04) <24h: Total 4.0% (4/99), 3.7% of the survivors (3/82) and 5.9% of the deceased (1/17) 24-48h: Total 60.6% (60/99), 64.6% of the survivors (53/82) and 41.2% of the deceased (7/17) 48-72h: Total 26.3% (26/99), 26.8% of…	Time onset symptoms to surgery Total: Mean 3.0 (n = 99) Survived: Mean 2.8 ± 1.8 days (range 0 - 15) (n = 82) Deceased: Mean 3.9 ± 2.6 days (range 1 - 9) (n = 17) (p = 0.188) <24h: Total 1.0% (1/99), 1.2% of the survivors (1/82) and 0% of the deceased (0/17) 24-48h: Total 42.4% (42/99), 45.1% of the survivors (37/82) and 29.4% of the deceased (5/17) 48-72h: Total 35.4% (35/99), 35.4% of the survi…	Time admission to surgery Total: Mean 17.4h (n = 100) Survived: Mean 15.6h ± 35.8 (range 0- 303)(n = 82) Deceased: Mean 25.6h ± 40.7 (range 2 - 170) (n = 18) (p = 0.228) <12h: Total 67% (67/100), 69.5% of the survivors (57/82) and 55.6% of the deceased (10/18) 12-24h: Total 14% (14/100), 14.6% of the survivors (12/82) and 11.1% of the deceased (2/18) >24h: Total 19% (19/100), 15.9% of the survivo…	NR	8% (8/100)	9.3% (8/86)	Time onset symptoms to presentation Total: Mean 2.1 days (n = 99) <24h: Total 4.0% (4/99) 24-48h: Total 60.6% (60/99) 48-72h: Total 26.3% (26/99) ≥72h: total 9.1% (9/99)	Time admission to surgery Total: Mean 17.4h (n = 100) <12h: Total 67% (67/100) 12-24h: Total 14% (14/100) >24h: Total 19% (19/100)
Lille	1996	United States	RC	1982-1992	1	29	Patients with NSTIs	Patients with descending, necrotizing mediastinal infections or postoperative wound infections	Diagnosis in all patients was confirmed by intraoperative findigns of extensive soft tissue or muscle necrosis on gross and histopathologic examination	Operative	32	NR	Full body	NS	13.7% (4/29)	NR	NR	Time presentation to surgery <12h: Total 58.6% (17/29), 64% of the survivers (16/25) and 25% of the deceased (1/4) >12h: Total 41.4% (12/29), 36% of the survivers (9/25) and 75% of the decased (3/4)	NR	6.9% (2/29)	8% (2/25)	NR	Time presentation to surgery <12h: Total 58.6% (17/29) >12h: Total 41.4% (12/29)
Liu	2012	China	RC	2004-2009	1	64	Patients with NF secondary to perianal abscess	NR	NR	NR	NR	50	Fournier	NS	15.6% (10/64)	NR	Time onset symptoms to treatment <72h: Total 21.9% (14/64), 25.9% of the survivors (14/54) and 0% of the deceased (0/10) 72-144h: total 60.9% (39/64), 61.1% of the survivors (33/54) and 60% of the deceased (6/10) >144h: total 17.2% (11/64), 13.0% of the survivors (7/54) and 40% of the deceased (4/10)	NR	NR	NA	NA	NA	NA
Mittapalli	2015	United Kingdom	RC	2009-2014	1	25	All patients with NSTIs secondary to intravenous drug use	Patients with cellulitis or simple abscess/pseudoaneurysm with absent signs of a necrotizing process	NR	NR	NR	39	Full body	In-hospital mortality rate (LOHS: NR)	4% (1/25)	NR	NR	Time admission to surgery Total: Median 23h (range 2 -195) (n = 24) Survival: Median 23h (range 2 -195) (n = 24)	NR	20% (5/25)	NR	NR	Time admission to surgery Total: Median 23h (range 2 -195) (n = 24) Amputated: Mean 20.8h (n = 5) Salvaged: Mean 44.7h (n=19)
Nawijn	2019	Netherlands	RC	2002-2016	2	81	All cases of NF	Patients with superficial infection (complex cellulitis or erysipelas) and out-of-hospital death before initial presentation at the hospital	Patients were included if the diagnosis of NF (including FG and myonecrosis) was confirmed by two out of three modalities: macroscopic findings during surgery, positive findings in the fascia fresh frozen section, and positive Gram staining or tissue cultures confirmed by the medical microbiology department	Operative, histopathology, microbiology	NR	56 (IQR 27)	Full body	In-hospital mortality rate (LOHS: Median 31 days)	32% (26/81)	NR	NR	Time presentation to surgery <12h: Total 60% (42/81) 12-24h: Total 11% (8/81) 24-48h: Total 20% (14/81) >48h: Total 9% (6/81)	NR	19% (15/81)	40.5% (15/37)	NR	Time presentation to surgery <12h: Total 60% (42/81) 12-24h: Total 11% (8/81) 24-48h: Total 20% (14/81) >48h: Total 9% (6/81)
Nawijn	2019	Netherlands	PC	2013-2018	1	28 (out of 36)	All patients with suspected SNSTD undergoing surgical exploration as part of the standardized approach with triple diagnostics	Patients not undergoing surgical exploration based on clinical symptoms evaluated by the surgeon were excluded	Triple diagnostics	Operative, histopathology, microbiology	53.7	NR	Full body	30-day mortality rate	25% (7/28)	Time onset symptoms to presentation Total: Median 24h (n = 28)	NR	Time suspicion to surgery Total: Median 1.4h (n = 28)	NR	4% (1/28)	6% (1/18)	Time onset symptoms to presentation Total: Median 24h (n = 28)	Time suspicion to surgery Total: Median 1.4h (n = 28)
Ogilvie	2006	United States	RC	1993-1997	1	150	Patients with NSTIs that involved the extremities including the hip and shoulder girdles and paraspinous region	NR	Included patients were described as having a NSTI by the surgical team or in the pathology report	Operative, histopathology	41	NR	Full body	NS	9.3% (14/150)	Time onset symptoms to diagnosis Total: Median 4.5 days (IQR 3 - 7) (n = 128)	NR	Time presentation to surgery <24h: Total 89% (134/150), 89% of the survivors (121/136) and 93% of the deceased (13/14) >24h: Total 11% (16/150), 11% of the survivors (15/136) and 7% of the deceased (1/14)	NR	6% (9/150)	6% (9/144)	Time onset symptoms to diagnosis Total: Median 4.5 days (IQR 3 - 7) (n = 128)	Time presentation to surgery <24h: Total 89% (134/150)
Pakula	2012	United States	RC	2008-2011	1	54	All patients with NF at discharge	NR	The diagnosis was also confirmed based on operating room findings	Operative	46 ± 11	NR	Full body	NS	16% (8/54)	NR	NR	Time admission to surgery Total: Mean 18 ± 25 (n = 54) <12h: Total 64% (35/54), 65% of the survivors (30/46) and 62.5% of the deceased (5/8) >12h: Total 36% (19/54), 35% of the survivors (16/46) and 37.5% of the deceased (3/8)	NR	15% (8/54)	21.1% (8/38)	NR	Time admission to surgery Total: Mean 18 ± 25 (n = 54)
Palmer	1995	United States	NR	1978-1992	1	30	Patients treated for FG	NR	NR	NR	NR	NR	Fournier	NS	43% (13/30)	NR	NR	Time presentation to surgery <24: Total 70% (21/30), 64.7% of the survived (11/17) and 76.9% of the deceased (10/13) >24: Total 30% (9/30), 35.3% of the survived (6/17) and 23.1% of the deceased (3/13) (p = 0.69)	NR	NA	NA	NA	NA
Park	2016	Korea	RC	2009-2013	1	30	Patients were diagnosed with NSTI or FG	Patients who died in the emergency room shortly after admission	NR	NR	62.6 ± 10.3	NR	Full body	NS	23.3% (7/30)	NR	NR	Time admission to surgery Total: Mean 137.4h (n = 30) Survivors: Mean 159.6h ± 33.3 (n = 23) Deceased: Mean 64.3h ± 24.3 (n = 7) <24h: Total 66.7% (20/30), 69.6% of the survivors (16/23) and 57.1% of the deceased (4/7) >24h: Total 33.3% (10/30), 30.4% of the survivors (7/23) and 42.9% of the deceased (3/7) (p = 0.657)	NR	NR	NR	NR	NR
Stephenson	1992	United States	RC	1983-1990	2	29	Female patients with cellulitis, NF and soft tissue infections of the vulva or the lower abdomen	Patients with postoperative wound infections, peripheral infection, or perirectal infections were excluded. Also patients with inflammatory bowel disease, malignancy, or previous radiation were excluded	NR	NR	NR	59	Vulva	NS	48% (14/29)	NR	NR	Time diagnosis to treatment Total: Mean 2.0 days ± 2.1 (n = 29) Survived: Mean 1.1 days ± 1.2 (n = 15) Deceased: Mean 2.4 days ± 2.6 (n = 14)	NR	NA	NA	NA	NA
Sudarsky	1987	United States	RC	1983-1986	2	33	NF confirmed by pathologic examination or clinical diagnosis of NF primarily based on operative findings	NR	Operative findings and upon pathologic examination	Operative, histopathology	46.2 ± 12.8	NR	Full body	NS	6.1% (2/33)	NR	NR	Time admission to surgery Total: Mean 43h (n = 33) <12h: Total 21% (7/33), 22.6% of the survivors (7/31) and 0% of the deceased (0/2) 12-48h: Total 48% (16/33), 45.2% of the survivors (14/31) and 100% of the deceased (2/2) >48h: Total 30% (10/33), 33.3% of the survivors (10/31) and 0% of the deceased (0/2)	NR	9.1% (3/33)	14% (3/22)	NR	Time admission to surgery Total: Mean 43h (n = 33) <12h: Total 21% (7/33) 12-48h: Total 48% (16/33) >48h: Total 30% (10/33)
Tsai	2010	Taiwan	RC	2002-2008	1	70	Patients with a history of Vibrio NF and sepsis who underwent surgery	NR	NR	NR	63	NR	Full body	NS	25.7% (18/70)	NR	NR	Time admission to surgery Total: Mean 14.59h (n = 71) Survivors: Mean 15.58h (n = 53) Deceased: Mean 11.67h (n = 18) (p = 0.34) ≤ 12h: Total 76% (54/71), 79% for survivors (42/53), 67% for deceased (12/18) > 12h: Total 24% (17/71), 21% for survivors (11/53), 33% for deceased (6/18) (p = 0.22)	NR	21% (15/71)	21% (15/71)	NR	Time admission to surgery Total: Mean 14.59h (n = 71) ≤ 12h: Total 76% (54/71) > 12h: Total 24% (17/71)
Tsai	2015	Taiwan	RC	2004-2012	1	18	Patients with surgically confirmed NF caused by A. hydrophila and K. pneumoniae who were admitted to the emergency department	Patients with A. hydrophila and patients with K. pneumoniae infections who had confirmed polymicrobial NF	Surgically confirmed	Operative	63.6 ± 14.9	NR	Full body	In-hospital mortality rate (LOHS: Mean 24.6 days)	44.4% (8/18)	NR	NR	Time presentation to surgery Total: Mean 6.5h (n = 18) Survival: Mean 6.5h (n = 10) Deceased: Mean 6.5h (n = 8)	NR	22.2% (4/18)	22.2% (4/18)	NR	Time presentation to surgery Total: Mean 6.5h (n = 18) Amputated: Mean 5.5h (n = 4) Salvaged: Mean 6.8h (n = 14)
Wang	1992	Taiwan	RC	1980-1988	1	18	The diagnosis of NF was based on the intraoperative findings of extensive necrosis of the fascia and subcutaneous tissue	NR	The diagnosis of NF was based on the intraoperative findings of extensive necrosis of the fascia and subcutaneous tissue	Operative	48	NR	Extremities	NS	33% (6/18)	Time onset symptoms to presentation >48h: 100% (18/18)	NR	Time from admission to surgery >24 h: Total 77.8% (14/18), 91.7% of the survivors (11/12) and 50% of the deceased (3/6) <24h: Total 22.2% (4/18), 8.3% of the survivors (1/12) and 50% of the deceased (3/6)	NR	NR	NR	NR	NR
Yu	2004	Taiwan	RC	1987-2001	1	15	Patients with both gout and NF	NR	NR	NR	54.7 ± 12.8	NR	Full body	NS	20% (3/15)	Time onset symptoms to presentation Total: Median 4 days (range 2 - 25) (n = 15) Survived: Mean 6.6 days (n = 12) Deceased: Mean 3.7 days (n = 3)	NR	Time admission to surgery Total: Median 1 day (range 0 - 15) (n = 13) <24h: Total 76.9% (10/13), 72.7% of the survivors (8/11) and 100% of the deceased (2/2) >24h: Total 23.1% (3/13), 18.2% of the survivors (2/11) and 0% of the deceased (0/2)	NR	26.7% (4/15)	26.7% (4/15)	Time between onset symptoms and presentation Total: Median 4 days (range 2 - 25) (n = 15) Amputation: Mean 6.8 days (n = 4) Salvaged: Mean 5.7 days (n = 11)	NR
STUDIES FOUND ELIGIBLE, BUT NOT SUITABLE FOR META-ANALYSIS														MORTALITY OUTCOMES						AMPUTATION OUTCOMES
Aridogan	2012	Turkey	RC	NR	1	71	Patients who were diagnosed with FG	NR	The clinical findings upon physical examination are important for the diagnosis of FG	Clinical signs	61.3	NR	Fournier	6-week mortality rate	30.4% (21/69)	NR	Time onset symptoms to surgery Total: Mean 7.5 days (n = 69) Survived: Mean 7.5 ± 4.15 days (n = 48) Deceased: Mean 7.5 ± 3.68 days (n = 21) (p = 0.12)	NR	NR	NA	NA	NA	NA
Backhaus	2011	Germany	RC	2000-2010	1	16	All spinal-cord injured patients over the age of 18 with FG	Patients with NF or FG without a spinal-cord injury	NR	NR	NR	43	Fournier	In-hospital mortality rate (LOHS: median 78 days (range 21 - 236))	0	NR	NR	Time admission to surgery <24h: Total 94% (15/16)	NR	NA	NA	NA	NA
Bucca	2012	Australia	RC	2000-2011	1	20	Patients admitted to the ICU with a diagnosis of NF	NR	Diagnosis of NF, defined as necrotizing infection involving at least the superficial fascia, was confirmed at operation	Operative	NR	52.5 (48-62.3)	Full body	In-hospital mortality rate (LOHS: median 19.5 days (IQR 9 - 43.0))	8.3% (2/24)	NR	NR	Time presentation to diagnosis Total: Median 16h (IQR 2 - 31.5) (n = 24) Time presentation to surgery Total: Median 20h (IQR 7 - 31) (n = 24)	NR	NR	NR	NR	NR
Bulger	2014	United States	RCT	2011-2012	6	40	A clinical diagnosis of NSTI due to bacterial infection (e.g., NF, group A Streptococcus toxic shock, FG, clostridial gangrene or myonecrosis, and synergistic necrotizing cellulitis) and a decision to perform urgent surgical exploration and debridement	Age less than 18 years; weight greater than 150 kg (owing to logistics related to drug preparation); pregnancy or lactation; prior curative tissue debridement; human immunodeficiency virus infection (CD4 count <200 cells/mm3 or <14% of lymphocytes); immunosuppression; diabetes mellitus with below-ankle infection; overt peripheral vascular disease in the involved area, refractory hemodynamic insta…	NR	NR	50.8	NR	Full body	28-day mortality rate	9.3% (4/43)	NR	NR	Time presentation to surgery Total: Mean 2.2h (n = 40)	NR	NR	NR	NR	NR
Chalya	2015	Tanzania	RC	2006-2014	1	84	All patients who were diagnosed and managed for FG	Patients who had incomplete data	The diagnosis of FG was based on history and clinical examination	Clinical signs	NR	34 (32-41)	Fournier	In-hospital mortality rate (LOHS: median 28 days (IQR 26 - 32))	28.6% (24/84)	Time onset symptoms to admission Total: Median 4 days (IQR 2 - 8) (n = 84) <48h: Total 23.8% (n = 20) >48h: Total 76.2% (n = 64) (OR 3.9, 95% CI 2.5-9.7; p < 0.001)	NR	NR	NR	NA	NA	NA	NA
Chen	2010	Taiwan	RC	1998-2006	2	41	Patients that were admitted with the diagnosis of FG	NR	NR	NR	57.2 ± 17.4	NR	Fournier	NS	19.5% (8/41)	NR	Time onset symptoms to surgery Total: Mean 3.9 ± 2.3 days (range 1 - 10 days) (n = 41) Survived: 3.5 ± 2.1 days (n = 33) Deceased: 5.6 ± 2.0 days (n = 8) (p <0.05)	NR	NR	NA	NA	NA	NA
Chen	2017	Canada	RC	2008-2013	2	60	Adult (>17 years) patients with a hospital discharge diagnosis of NF	Patients transferred directly from another facility for specialty treatment were excluded	NR	NR	53.7 ± 17.8	NR	Full body	In-hospital mortality rate (LOHS: median 17.1 days (IQR 7.8 - 33.5))	21.7% (13/60)	NR	NR	Time presentation to surgery Total: Median 15.5h (IQR 7.8 - 74.9) (n = 50)	NR	NR	NR	NR	NR
Cheng	2008	Taiwan	RC	1997-2006	1	14	NF affecting the upper extremity	NR	A definitive diagnosis of NF depends on the surgical findings and the pathological study of the surgical specimens	Operative, histopathology	61	NR	Upper extremity	NS	35.7% (5/14)	NR	NR	Time admission to surgery <24h: Total 84.6% (11/14)	NR	0	0	NR	Time admission to surgery <24h: Total 84.6% (11/14)
Corman	1999	United States	RC	1994-1997	4	23	Diagnosis of FG with a clinical picture consistent with a rapidly progressive, fulminant infection arising primarily from the scrotum, perineum and penis and the presence of necrotic tissue on surgical exploration	NR	Diagnosis of FG with a clinical picture consistent with a rapidly progressive, fulminant infection arising primarily from the scrotum, perineum and penis and the presence of necrotic tissue on surgical exploration	Operative	51.7	NR	Fournier	In-hospital mortality rate (LOHS: NR)	4% (1/26)	NR	NR	NR	Duration of initial procedure Total: Mean 1.3h (range 0.5-3h)	NA	NA	NA	NA
Czymek	2009	Germany	PC	1996-2007	1	33	Patients who underwent inpatient surgical procedures for FG	Patients who had a local superficial inflammation of the perianal or urogenital regions and did not meet at least seven of the nine criteria described by Fisher et al.	The diagnostic criteria for NF according to Fisher et al.	Clinical Signs, operative	NR	59	Fournier	In-hospital mortality rate (LOHS: NR)	18.2% (6/33)	Time onset symptoms to presentation Total: median 6 days (range 2 -28 days) (n = 33)	NR	NR	NR	NA	NA	NA	NA
Eggerstedt	2015	United States	RC	2007-2012	1	81	Patients that presented with rapidly spreading NSTIs, requiring surgical debridement	Patients diagnosed with NSTIs but deemed terminal due to extent of the disease or comorbidities. These patients bypassed surgical intervention	NR	NR	50.4 ± 16.9	NR	Full body	In-hospital mortality rate (LOHS: Median 28 days (IQR 14 - 54))	16% (13/81)	Time onset symptoms to admission Total: Median 4 days (IQR 2 - 7) (n = 81) Survivors: Median 4 days (IQR 2 - 7) (n = 68) Deceased: Median 3.5 days (2 - 5.75) (n = 13) (p = 0.77)	Time onset symptoms to surgery Total: Median 4.5 days (IQR 3 - 8) (n = 81) Survived: Median 5 days (IQR 3 - 8) (n = 68) Deceased: Median 4 days (IQR 3 - 6) (n = 13) (p = 0.71)	NR	NR	NR	NR	NR	NR
Elander	2016	Sweden	RC	1998-2014	1	59	Patients diagnosed with cervical NF	Patients with localized infections (erysipelas, cellulitis) and abscesses	Severe soft tissue infection in head and neck area with pain out of proportion, radiological signs of free gas in tissue, and/or facial oedema (CT), confirmed necrotic tissue at surgery associated with liquefied purulent secretion and a rotten, waste like odor, and deranged vital parameters and need for intensive care	Operative	NR	60	Cervical	3-month mortality rate	10% (6/59)	NR	NR	Time presentation to diagnosis Total: Mean 3.8h (n = 59) Survived: Mean 3.7h ± 3.7 (range 0 - 16) (n = 53) Deceased: Mean 4.6h ± 3.8 (range 1 - 11) (n = 6) (p = 0.4824) Time presentation to surgery Total: Mean 4.0h (n = 59) Survived: Mean 3.8h ± 3.8 (range 0 - 16) (n = 53) Deceased: Mean 6.2h ± 5.0 (range 1 - 12) (n = 6) (p = 0.2749)	NR	NA	NA	NA	NA
Elskaket	2018	South Africa	RC	2010-2014	1	44	All patients treated for FG	NR	Diagnosis was made on the basis of history and clinical examination	Clinical signs	51	NR	Fournier	NS	11.4% (5/44)	NR	NR	NR	Duration of first surgery Total: Mean 81min (range 33-240)	NA	NA	NR	NR
Endorf	2005	United States	RC	1998-2003	1	65	Rapidly spreading NSTIs that required radical surgical debridement	Abscesses requiring wide area incision and drainage	Requiring surgical debridement	Operative	51 ± 1.83	NR	Full body	NS	17% (11/65)	Time onset symptoms to presentation Total: Mean 6.9 ± 1.19 days (n = 65) Survived: Mean 4.2 days (n = 54) Deceased: Mean 3 days (n = 11)	Time from onset symptoms to surgery Total: Mean 5.3 ± 0.50 days (n = 65) Survived: Mean 5.6 days (n = 54) Deceased: Mean 3.6 days (n = 11)	NR	NR	NR	NR	NR	NR
Fajdic	2007	NR	NR	1997-2000	NR	7	FG	NR	NR	NR	61	NR	Fournier	In-hospital mortality rate (LOHS: Mean 25.8 days)	14.3% (1/7)	Time onset symptoms to admission Total: Mean 5.4 days (range 3 - 9)(n = 7) Survived: Mean 4.8 days (n = 6) Deceased: Mean 9 days (n = 1)	NR	NR	NR	NA	NA	NA	NA
Faucher	2001	United States	RC	1990-1999	1	57	All patients admitted for acute care with the diagnosis of NF or FG	NR	NR	NR	51.8 ± 1.9	NR	Full body	In-hospital mortality rate (LOHS: Mean 26.3 ± 2.2)	12% (7/57)	Time onset symptoms to presentation Total: Mean 4.9 ± 1.0 days (n = 57) Survivors: Mean 5.1 ± 1.1 days (n = 50) Deceased: Mean 3.1 ± 0.7 days (n = 7)	NR	Time presentation to surgery Total: Mean 1.6 ± 0.4 days (n = 57) Survived: Mean 1.7 ± 0.4 days (n = 50) Deceased: Mean 0.3 ± 0.2 days (n = 7)	NR	7% (4/57)	14% (4/29)	Time onset symptoms to presentation Total: Mean 4.9 ± 1.0 days (n = 57)	Time presentation to surgery Total: Mean 1.6 ± 0.4 days (n = 57)
Flanagan	2009	United States	RC	2001-2006	1	10	Patients diagnosed with cervical NF	Patients with NF without evidence of cervical anatomy involvement	NR	NR	43 ± 10.9	NR	Cervical	NS	0	NR	NR	Time admission to surgery <24h: Total 80% (8/10) 24-48h: Total 20% (2/10)	NR	NA	NA	NA	NA
Frazee	2008	United States	RC	1990-2001	1	122	Cases of skin and soft tissue infection presenting to the ED that were taken to the operating room, in which surgical pathology findings (intra-operative or at autopsy) were consistent with NSTI	Hospital-acquired NSTI, not being admitted to the hospital through the ED, and a post-operative diagnosis of abscess or digital gangrene	Surgical pathology findings (intra-operative or at autopsy) consistent with NSTI	Histopathology	44.1 ± 11.1	NR	Full body	NS	16.4% (20/122)	NR	NR	Time admission to surgery Total: Mean 8.4h (range 1.9 - 304.9)	NR	4.1% (5/122)	NR	NR	Time admission to surgery Total: Mean 8.4h (range 1.9 - 304.9)
Freischlag	1985	United States	RC	1958-1982	2	21	Presented with NSTI	NR	NR	NR	48.5	NR	Full body	NS	52% (11/21)	NR	NR	Time diagnosis to surgery Total: Mean 1.9 days (n = 21) <24h: 36% mortality rate >48h: 70% mortality rate	NR	NR	0.36	NR	Time diagnosis to surgery Total: Mean 1.9 days (n = 21)
Friederichs	2013	Germany	RC	2006-2010	1	38	Patients treated with the diagnosis of NSTI in the ICU	NR	The initial diagnosis of NF was based on clinical characteristics and intraoperative findings; in all patients, the diagnosis was confirmed by histopathologic examination	Operative, histopathology	58	58.5	Full body	NS	29% (11/38)	NR	NR	Time admission to surgery <24h: Total 100% (38/38)	NR	45% (17/38)	71% (17/24)	NR	Time admission to surgery <24h: Total 100% (38/38)
Göktas	2012	Turkey	RC	2004-2010	1	36	Patients with the diagnosis of FG	NR	The diagnosis was primarily based on physical examination; data of complete blood count and serum levels of creatinine, sodium, potassium, and bicarbonate were noted	Clinical signs	55.5	NR	Fournier	NS	11.1% (4/36)	Time onset symptoms to admission Total: Mean 5.2 ± 2.6 days (n = 36)	NR	NR	NR	NA	NA	NA	NA
Hasdemir	2009	Turkey	RC	1996-2006	3	10	Patients with FG	Patients with a simple perianal, perineal, or urogenital abscess without necrotizing infection	The diagnosis of FG was established on clinical characteristics, which based on patients history and physical examination.	Clinical signs	52.7 ± 18.2	NR	Fournier	NS	10% (1/10)	Time onset symptoms to admission Total: Mean 5.5 ± 1.9 days (range 2 - 8) (n = 10)	NR	NR	NR	NA	NA	NA	NA
Hong	2009	Taiwan	RC	2002-2005	1	195	Patients with a discharge diagnosis of NF	Patients that developed NF in the ward or ICU, that were admitted to the hospital through outpatient departments, that were not initially evaluated in the ED, that were transferred from another hospital, that did not receive an operation, or were younger than 19 years	NR	NR	55.3 ± 16.1	NR	Full body	In-hospital mortality rate (LOHS: median 33 days (IQR 20 - 51))	14.4% (28/195)	Time onset symptoms to presentation Total: Median 3 days (IQR 2 - 4) (n = 195)	NR	Time presentation to diagnosis Total: Median 120min (IQR 60 - 270) (n = 195) Time diagnosis to surgery Total: Median 300 min (IQR 120 - 840) (n = 195) Time presentation to surgery Total: Median 540min (IQR 240 - 1380) (n = 195) >8h: Total 83% (161/195), 85.6% of the survivors (143/167) and 64.3% of the deceased (18/28) (p = 0.006)	NR	31.3% (61/195)	NR	Time onset symptoms to presentation Total: Median 3 days (IQR 2 - 4) (n = 195)	Time presentation to diagnosis Total: Median 120min (IQR 60 - 270) (n = 195) Time diagnosis to surgery Total: Median 300 min (IQR 120 - 840) (n = 195) Time presentation to surgery Total: Median 540min (IQR 240 - 1380) (n = 195)
Hong	2014	China	RC	2001-2012	1	15 (out of 34)	All patients who underwent surgery for Vibrio NF with septic shock on initial presentation	NR	NSTI was defined by either histopathologic or surgical findings such as the presence of necrosis of skin, subcutaneous fat, superficial fascia, or underlying muscles	Operative, histopathology	51.65	NR	Full body	In-hospital mortality rate (LOHS: mean 24.59 days)	60% (9/15)	NR	NR	Time admission to surgery Total: Mean 82.00min ± 33.85 (n = 15)	Duration first procedure: Total: Mean 102.00 min ± 18.97 (n = 15)	20% (3/15)	20% (3/15)	NR	Time admission to surgery Total: Mean 82.00min ± 33.85 (n = 15)
Hua	2015	France	RC	1996-2012	1	109	Patients hospitalized for NSTI.	NR	NSTI was characterized by subcutaneous tissue, fascia, or muscle necrosis with confirmation of the diagnosis by presence of necrotic tissue at the time of surgery or, in the absence of surgery, the presence of unequivocal clinical signs (necrosis and sepsis) as defined previously.	Operative	NR	62 (49-75)	Full body	28-day mortality rate	28.4% (31/109)	NR	NR	Time admission to surgery <12h: Total 52% (51/101) (HR 0.8, 95% CI 0.4-1.9) 12-24h: Total 25% (25/101) (HR 0.9, 95% CI 0.4-2.4) 24-48h: Total 15% (15/101) (HR 1.3, 95% CI 0.4-3.7) >48h: Total 9% (9/101) (HR 1.3, 95% CI 0.4-3.8)	NR	13.7% (15/109)	19.2% (15/75)	NR	Time admission to surgery <12h: Total 52% (51/101) 12-24h: Total 25% (25/101) 24-48h: Total 15% (15/101) >48h: Total 9% (9/101)
Kantu	1997	United States	RC	1985-1995	1	8	All cases of cervical NF	NR	NR	NR	50	NR	Cervical	NS	25% (2/8)	NR	NR	Time presentation to surgery <24h: Total 100% (8/8)	NR	NA	NA	NA	NA
Karkas	2009	France	RC	1995-2008	1	17	The coexistence of cervical NF and descending necrotizing mediastinitis, as confirmed by clinical findings and CT of the neck and chest with intravenous contrast administration	NR	Confirmed by clinical findings and CT of the neck and chest with intravenous contrast administration	Clinical signs	54	NR	Cervical	NS	5.9% (1/17)	NR	Time onset symptoms and treatment Total: Mean 4 days (range 1 - 7) (n = 17)	Time admission to surgery <24h: Total100% (60/60)	NR	NA	NA	NA	NA
Keeley	2014	United States	RC	2008-2013	1	138	All patients with an NSTI. To be included, the operating surgeon had to describe an infection containing necrosis of the skin, subcutaneous fat, fascia, and/or muscle that require wide debridement for source control.	NR	Patients were added to the database based on the surgeon's intraoperative findings of an NSTI. All diagnoses were confirmed by the authors' view of the final pathology	Operative, histopathology	NR	46 (40-56)	Full body	In-hospital mortality rate (LOHS: Median: 14.7 days)	14.5% (20/138)	Time onset symptoms to admission Total: Median 3.9 days (n = 138) Survived: Median 4 days (IQR 3 -7) (n = 118) Deceased: Median 3 days (IQR 2 -3.5) (n = 20) (p = 0.01)	NR	Time admission to surgery Total: Median 7.6h (n = 138) Survived: Median 8h (IQR 5 - 18) (n = 118) Deceased: Median 5.5h (IQR 3.5 - 9) (n = 20)	NR	15.7% (21/133)	NR	Time onset symptoms to admission Total: Median 3.9 days (n = 138)	Time admission to surgery Total: Median 7.6h (n = 138)
Keung	2013	United States	RC	1995-2011	1	201	All patients 18 years or older diagnosed as having been treated for NSTI at our institution	NR	NR	NR	NR	54.7	Full body	In-hospital mortality rate (LOHS: Median 15 days, (IQR 8 - 27))	48.8% (98/201)	Time onset symptoms to presentation <12h: Total 9.9% (19/191) 12-24h: Total 15.7% (30/191) >24h: Total 74.3% (142/191)	NR	Time presentation to diagnosis <12h: Total 63.1% (125/198) 12-24h: Total 17.7% (35/198) >24h: Total 19.2% (38/198) Univariate analysis for mortality p = 0.003 Time presentation to surgery <12h: Total 62.1% (118/190) 12-24h: Total 18.4% (35/190) >24h: Total 19.5% (37/190) Univariate analysis for mortality p <0.001	NR	NR	NR	NR	NR
Kiralj	2015	Serbia	RC	2008-2012	1	216	Patients treated for acute NF, localized on different parts of the body	NR	Diagnostic criteria for acute NF used were: clinical evidence of rapid superficial fascial necrosis either by direct clinical inspection or by surgical exploration; the diagnosis was made indirectly by laboratory findings (microbiology or histological examination).	Operative, histopathology, microbiology	52	NR	Full body	NS	14.35% (31/216)	NR	NR	Time admission to surgery <24h: Total 84.72% (183/216)	NR	6.94% (15/216)	9.9% (15/151)	NR	Time admission to surgery <24h: Total 84.72% (183/216)
Koukouras	2011	Germany	RC	1999-2009	2	45	All patients diagnosed with FG	Patients with solitary perianal, periurethral and scrotal abscesses were excluded if there was no evident soft tissue extension or necrosis	The diagnosis of FG depended on the clinical symptoms/signs like erythema, rash, swelling, crepitus and necrosis in the perineal, perianal or genital areas.	Clinical signs	50 ± 15.8	NR	Fournier	In-hospital mortality rate (LOHS: Mean 15.7 days ± 11.6)	15.6% (7/45)	NR	Time from onset symptoms to surgery Total: Mean 5.3 ± 2.8 days (n = 45) Survived: Mean 5.3 ± 2.8 days (n = 38) Deceased: Mean 5.3 ± 2.6 days (n = 7)	NR	NR	NA	NA	NA	NA
Kulasegaran	2016	Australia	RC	2000-2010	1	138	Patients diagnosed with NF	NR	Patients were included based on the operating consultant surgeon diagnosing NF at the time of surgery. Patients that were unstable operative candidates were diagnosed based on clinical signs	Operative	NR	NR	Full body	30-day mortality rate; in-hospital mortality rate (LOHS: Median 20 days)	20.3% (28/138); 21.7% (30/138)	Time onset symptoms to presentation Total: Mean 2 days (n = 138)	NR	Time admission to surgery Total: Mean 10h (n = 129)	NR	9.4% (13/138)	14.4% (13/90)	Time onset symptoms to presentation Total: Mean 2 days (n = 138)	Time admission to surgery Total: Mean 10h (n = 129)
Kumar	2011	India	PC	2005-2007	1	62	Patients with Type II diabetes mellitus and NF involving the extremities	Patients other than diabetes mellitus type II who were diagnosed to have NF	NR	NR	56.6 ± 10.22	NR	Extremities	NS	1.6% (1/62)	Time onset symptoms to presentation Total: Mean 6.08 ± 3.86 days	NR	NR	NR	12.9% (8/62)	NR	Time onset symptoms to presentation Total: Mean 6.08 ± 3.86 days	NR
Lee	2014	United Kingdom	RC	2004-2010	1	15 (out of 24)	Patients who were treated for NSTI	NR	NR	NR	52.1	NR	Full body	In-hospital mortality rate (LOHS: NR)	26.7% (4/15)	NR	NR	Time presentation to surgery Total: Mean 17.7h (range 3 - 38) (n = 15) Survived: Mean 17.5h (n = 11) Deceased: Mean 18.3h (n = 4) Time diagnosis to surgery Total: Mean 4h (range 1 - 8h)	NR	NR	NR	NR	NR
Lim	2006	Singapore	RC	1998-2005	1	29	Cases of NF		Diagnosis was made based on intraoperative findings of grayish necrotic and avascular fascia which broke down easily with gentle finger dissection and classic 'dishwater' pus	Operative	65	NR	Upper extremity	NS	10.3% (3/29)	Time onset symptoms to admission Total: Mean 5.8 days (range 1 - 21 days) (n = 29)	NR	Time admission to surgery Total: Mean 13.2h (range 2 - 48h) (n = 28) <24h: Total 86% (25/29) 24-48h: Total 10% (3/29)	NR	24% (7/29)	24% (7/29)	Time onset symptoms to admission Total: Mean 5.8 days (range 1 - 21 days) (n = 29)	Time admission to surgery Total: Mean 13.2h (range 2 - 48h) (n = 28) <24h: Total 86% (25/29) 24-48h: Total 10% (3/29)
Marín	2011	Spain	RC	1998-2008	1	34	Patients diagnosed of FG in our ED	NR	NR	NR	NR	69 (49-79)	Fournier	In-hospital mortality rate (LOHS: Median 29 days (IQR: 13 - 60))	26.5% (9/34)	Time onset symptoms to admission Total: Median 2.7 days (n = 34) Survived: Median 3 days (IQR 2 - 4.5) (n = 25) Deceased: Median 2 days (IQR 3.5 - 5) (n = 9)(p = 0.268)	NR	NR	NR	NA	NA	NA	NA
McCormak	2015	Canada	RC	2000-2012	1	25	All patients treated for FG	NR	The diagnosis of FG was based on clinical examination, which showed skin necrosis and was confirmed under anesthesia when the skin incision revealed the gray-black appearance of gangrenous tissue along with purulence	Operative	56	58	Fournier	90-day mortality rate	20% (5/25)	NR	NR	Time admission to surgery Total: Mean 22.09h (median 16.76h) (n = 25) Survived: Mean 16.36h (median 8.95) (n =20) Deceased: Mean 45.03h (median 48.0) (n = 5) (p = 0.50)	NR	NA	NA	NR	NA
McGeehan	1984	Zuid-Afrika	RC	1978-1983	1	43	Patients with FG and the following criteria: fulminating progression of the infection from onset to treatment, extension of the gangrene to extrascrotal tissue, identification of multiple pathogenic organisms, and the need for aggressive debridement suoplemented by broad-spectrum antimicrobial treatment to control te infection	NR	Identification of multiple pathogenic organisms and the need for aggressive debridement	Operative, microbiology	45.9	NR	Fournier	NS	18.6% (8/43)	NR	Time onset symptoms to treatment Total: Mean 4.25 days (range 1 - 11) (n = 43)	NR	NR	NA	NA	NA	NA
McHenry	1995	United States	RC	1989-1994	1	65	All patients with NSTI involving the subcutaneous tissue and fascia with or without associated skin or muscle necrosis	NR	The presence of necrosis was confirmed from results of frozen or permanent histopathologic tissue examinations	Histopathology	50	NR	Full body	NS	29% (19/65)	NR	NR	Time admission to surgery Total: Mean 45h (range 1.7 - 312) (n = 40) Survived: Mean 25h ± 39 (n = 46) Deceased: Mean 90h ± 95 (n = 19) (p = 0.0002)	NR	18.46% (12/65)	46.2% (12/26)	NR	Time admission to surgery Total: Mean 45h (range 1.7 - 312) (n = 40)
Misiakos	2017	Greece	RC	2005-2015	4	62	All patients admitted with a diagnosis of NF	NR	The initial diagnosis was established mainly based on patient's clinical data and laboratory results. In equivocal cases, the diagnosis was ascertained with imaging studies, mainly CT scan and/or plain radiography.	Clinical signs	63.7	NR	Full body	NS	17.7% (11/62)	NR	NR	Time admission to surgery Total: Mean 12.8h (median 8.7h, range 5.3 - 27.2h) (n = 62) <24h: Total 95.2% (59/62) >24h: Total 4.8% (3/62)	NR	25.8% (16/62)	57.1% (16/28)	NR	Time admission to surgery Total: Mean 12.8h (median 8.7h, range 5.3 - 27.2h) (n = 62) <24h: Total 95.2% (59/62) >24h: Total 4.8% (3/62)
Nordqvist	2015	Sweden	RC	2003-2013	1	31	All patients with an intraoperative diagnosis of NF made by specialists in the fields of infection, orthopedics or plastic surgery; or, for patients who did not undergo surgery, with diagnosis of NF assessed by specialists in infectious medicine	Lack of documentation or an inability to obtain relevant data for diagnosis	An intraoperative diagnosis of NF made by specialists in the fields of infection, orthopedics or plastic surgery; or, for patients who did not undergo surgery, with diagnosis of NF assessed by specialists in infectious medicine	Operative, microbiology	NR	57	Full body	In-hospital mortality rate (LOHS: survivors mean 36 days)	19% (6/31)	Time onset symptoms to presentation Total: Mean 31h (Median 24h, range 0 - 144h) (n = 31)	Time onset symptoms to surgery Total: Mean 65h (median 48h, range 6 - 288) (n = 27)	Time admission to surgery Total: Mean 19h (median 9h, range 0-123) (n = 27) Survived: Mean 20.6h (n = 24) Deceased: Mean 6h (n = 3) Time admission to diagnosis Total: Mean 17 h (median 6h, range 0 - 123) (n = 29) Time diagnosis to surgery Total: Mean 3h (median 2h, range 0 - 11) (n = 27)	NR	9.7% (3/31)	13% (3/23)	Time onset symptoms to presentation Total: Mean 31h (Median 24h, range 0 - 144h) (n = 31)	Time admission to surgery Total: Mean 19h (median 9h, range 0 - 123) (n = 27) Time admission to diagnosis Total: Mean 17 h (median 6h, range 0 - 123) (n = 29) Time diagnosis to surgery Total: mean 3h (median 2h, range 0 - 11) (n = 27)
Obiechina	2001	Nigeria	RC	1982-1999	1	8	NF of odontogenic origin	NR	NR	NR	58	NR	Odontogenic	NS	12.5% (1/8)	Time onset symptoms to presentation Total: Mean 34 days (range 26 - 42) (n = 8) Survived: Mean 33 days (n = 7) Deceased: Mean 42 days (n = 1)	NR	NR	NR	NA	NA	NA	NA
Okoye	2013	United States	PC	2006-2011	1	64	Patients with NSTI	Patients were excluded if only one or no surgical source control was performed	The diagnosis of NSTI was made if there was necrotic tissue at the time of surgery (documented by the operating attending surgeon) or necrotic tissue (fascia or muscle) in pathology specimens	Operative, histopathology	48.8 ± 12.8	NR	Full body	In-hospital mortality rate (LOHS: Mean 34.0 days ± 3.7)	14.1% (6/64)	Time onset symptoms to presentation Total: Mean 9.3 ± 2.1 days (n = 64)	NR	Time admission to surgery Total: Mean 34.8h ± 6.2	NR	NR	NR	NR	NR
Olusanya	2015	Nigeria	PC	2007-2013	1	24	All patients who presented with cervical NF	NR	NR	NR	42.8 ± 22.444	NR	Cervical	NS	8.3% (2/24)	Time onset symptoms to presentation Total: Mean 13.3 ± 5.531 days (n = 24)	NR	NR	NR	NA	NA	NA	NA
Omisanjo	2014	Nigeria	RC	2008-2013	1	11	Patients that presented with FG	NR	NR	NR	51.9	NR	Fournier	NS	0	Time symptoms to presentation Total: Mean 9.6 days (range 1 - 21) (n = 11)	NR	NR	NR	NA	NA	NA	NA
Oncul	2008	Turkey	NR	1998-2006	1	23	NF patients	NR	NR	NR	58.4 ± 13.2	NR	Full body	In-hospital mortality rate (LOHS: Mean 23.9 days ± 12.7)	39.1% (9/23)	Time onset symptoms to presentation Total: Mean 9.6 days (range 3 -21) (n = 23)	NR	NR	NR	NR	NR	NR	NR
Oymaci	2014	Turkey	RC	2011-2013	1	16	Patients who were diagnosed and treated for FG	NR	The diagnosis were made by clinical examination findings; patients with perineal, inguinal and gluteal skin tenderness, erythema, induration, swelling in the scrotum and external genital organs, gangrene cyanosis, skin necrosis and subcutaneous crepitus on physical examination were considered as FG	Clinical signs	61.2 ± 12.3	NR	Fournier	NS	18.8% (3/16)	Time symptoms to admission Total: Mean 4.31 ± 1.81 days (n = 16) Survived: Mean 3.77 ± 1.42 days (n = 13) Deceased: Mean 6.67 ± 1.52 days (n = 3) (p = 0.007)	NR	NR	NR	NA	NA	NA	NA
Ozdinc	2015	Turkey	RC	2012-2015	1	5	Patients diagnosed with cervicofacial NF	NR	NR	NR	60.2	NR	Cervicofacial	NS	60% (3/5)	Time onset symptoms to presentation Total: Mean 2.8 days (range 1 - 5) (n = 5)	NR	NR	NR	NA	NA	NR	NR
Pessa	1985	United States	NR	NR	1	33	All patients with necrotizing infections involving fascia, skin and subcutaneous tissue with or without myonecrosis	Costridial myonecrosis	NR	NR	56	NR	Full body	NS	33% (11/33)	NR	NR	Time presentation to surgery Total: Mean 6 days (n = 33) Survived: Mean 3.5 days (n = 22) Deceased: Mean 11.7 days (n = 11)	NR	3% (1/33)	9.1% (1/11)	NR	Time presentation to surgery Total: Mean 6 days (n = 33)
Rizos	2005	Greece	RC	NR	1	6	Patients treated for FG	NR	NR	NR	49.3	NR	Fournier	NS	0	NR	Time from onset symptoms and treatment Total: Mean 2.1 days (range 1 - 4 days) (n = 6)	NR	NR	NA	NA	NA	NA
Rosing	2010	United States	RC	2006-2009	1	10	All patients with NSTI receiving Drotrecogin alfa	NR	NR	NR	NR	47	Full body	In-hospital mortality rate (LOHS: median 13 days)	10% (1/10)	NR	NR	Time presentation to surgery Total: Median 435min (IQR 300 - 520) (n = 10)	NR	50% (5/10)	83% (5/6)	NR	Time presentation to surgery Total: Median 435min (IQR 300 - 520) (n = 10)
Saffle	2008	United States	RC	1992-2005	1	30	Patients requiring acute care for FG or who had necrotizing infection of the perineum, genitalia, or groin	Patients with necrotizing infections originating in other body areas, including panniculitis of the abdominal wall and primary intraperitoneal infections	NR	NR	54.3 ± 14.1	NR	Fournier	NS	16.6% (5/30)	NR	NR	Time admission to surgery <24h: Total 100% (30/30)	NR	NA	NA	NA	NA
Sallami	2012	Tunise	RC	1995-2010	1	40	All patients diagnosed with FG	NR	NR	NR	52.75 ± 10.8	NR	Fournier	In-hospital mortality rate (LOHS: NR)	17.5% (7/40)	Time onset symptoms to admission Total: Mean 8.72 ± 2.09 days (range 3 - 30) (n = 40) Survived: Mean 9.1 days (range 3 - 30) (n = 33) Deceased: Mean 6.8 days (range 3 -15) (n = 7) (p = 0.16)	NR	NR	NR	NA	NA	NA	NA
Sarkut	2016	Turkey	PC	1996-2012	1	64	Patients with FG	NR	NR	NR	NR	57	Fournier	NS	28.1% (18/64)	Time onset symptoms to presentation Total: Median 7 days (range 3 - 35) (n = 64)	NR	Time admission to surgery <12h: Total 100% (64/64)	NR	NA	NA	NA	NA
Schecter	1982	United States	RC	1970-1980	2	33	Upper extremity soft tissue infection requiring operative debridement	NR	Operative report describing extensive necrosis of fascia and surrounding soft tissue requiring debridement	Operative	39 ± 16	NR	Upper extremity	NS	9% (3/33)	Time onset symptoms to presentation <24h: Total 3% (1/31) 24-48h: Total 13% (4/31) 48-72h: Total 32% (10/31) 72-96h: Total 19% (6/31) >96h: Total 16% (5/31)	NR	Time admission to surgery <24h: Total 48% (16/31) 24-48h: Total 9% (3/31) 48-72h: Total 24% (8/31) 72-96h: Total 15% (5/31) >96h: Total 3% (1/31)	NR	NR	NR	NA	NA
Shah	2009	India	PC	2007-2009	1	54	All patients admitted wit diagnosis of NSTI	NR	NR	NR	54.96	NR	Full body	NS	1.85% (1/54)	Time onset symptoms to presentation <10 days: Total 65% (35/54) >10 days: Total 35% (19/54)	NR	Time admission to surgery Total: Mean 6.2h (range 2.1 - 10.4h) (n = 54)	NR	0	0	Duration of symptoms <10 days: 65% (35/54) >10 days: 35% (19/54)	Time admission to surgery Total: Mean 6.2h (range 2.1 - 10.4h) (n = 54)
Simsek Celik	2010	Turkey	RC	2003-2008	1	20	Patients with FG	NR	The diagnosis of FG was based on patient history, clinical symptoms and findings, i.e. rash, swelling and erythema	Clinical signs	52.2	NR	Fournier	NS	20% (4/16)	Time onset symptoms to presentation Total: Mean 8.4 days (n = 20) Survived: Mean 7.1 days (n = 16) Deceased: Mean 13 days (n = 4) (p > 0.05)	NR	NR	NR	NA	NA	NA	NA
Spence	2017	United States	RC	2008-2015	1	158	Adult patients with NSTIs	Patients with below the ankle diabetic foot infections were excluded	NR	NR	NR	49.7	Full body	In-hospital mortality rate (LOHS: median 15.6 days)	13.2% (19/158)	NR	NR	Time presentation to surgery Total: Median 8h (n = 158)	NR	12% (19/158)	20.4% (19/93)	NR	NR
Stamenkovic	1984	Switzerland	RC	1970-1983	1	19	Histologic diagnosis of NF	NR	Histological confirmed	Histopathology	56.1	NR	Full body	NS	47.4% (9/19)	NR	Time onset symptoms to treatment Total: Mean 4 days (range 0 - 15 days) (n = 19)	NR	NR	NR	NR	NR	NR
Swain	2013	United Kingdom	RC	2006-2011	1	15	Patients who developed NF	NR	A diagnosis of NF was made based on clinical findings (such as erythema and pain out of proportion to physical appearance) and confirmed on surgical investigation revealing grey necrotic tissue, lack of dermal bleeding, lack of resistance on blunt dissection and foul 'dishwater' pus	Operative	NR	51.0	Full body	NS	20% (3/15)	Time onset symptoms to presentation Total: Median 2.0 days (range 1 -7) (n = 15)	NR	Time admission to surgery <24h: Total 60% (9/15)	NR	6,7% (1/15)	9,1% (1/11)	Time onset symptoms to presentation Total: Median 2.0 days (range 1 -7) (n = 15)	Time admission to surgery <24h: Total 60% (9/15)
Taken	2016	Turkey	RC	2006-2014	1	65	Patients diagnosed with FG	NR	The diagnosis of FG depended on the clinical symptoms/signs like erythema, rash, swelling, crepitus and necrosis in the perineal, perianal or genital areas.	Clinical signs	52.4	NR	Fournier	90-day mortality rate	12.3% (8/65)	Time onset symptoms to admission Total: Mean 3.74 ± 2.09 days (range 1 - 10) (n = 65)	NR	NR	NR	NA	NA	NA	NA
Tan	2016	Singapore	RC	2005-2014	1	127	All patients with surgically proven NF affecting the upper and lower limbs	Patients with NF involving the head, neck or trunk	The diagnosis was confirmed at surgery by the characteristic findings of 'dishwater' fluid, abnormalities of the deep fascia, which is friable with a greyish color, and lack of bleeding of the underlying muscles during dissection. If there was any doubt as to the diagnosis, biopsies were taken at the time of surgery, and microbiological swabs were taken in all patients	Operative	56.3	NR	Extremities	NS	24.4% (31/127)	Time onset symptoms to presentation <5 days: Total 65.3% (81/127) >5 days: Total 34.7% (43/127)	NR	Time admission to surgery <24h: Total 47.2% (60/127)	NR	29.1% (37/127)	29.1% (37/127)	Time onset symptoms to presentation <5 days: Total 65.3% (81/127) >5 days: Total 34.7% (43/127)	Time admission to surgery <24h: Total 47.2% (60/127)
Tiu	2005	New Zealand	RC	1997-2002	1	48	Patients were enrolled based on the clinical, operative or histological findings of NF	Referred patients after primary surgical debridement. Patients younger than 15 years.	Patients were enrolled based on the clinical, operative or histological findings of NF	Operative, histopathology	NR	51	Full body	NS	29% (14/48)	NR	NR	Time admission to surgery Total: Mean 35.4h (n = 48) Survived: Mean 21h (n = 34) Deceased: Mean 45h (n = 14)	NR	10.4% (5/48)	16.7% (5/30)	NR	NR
Tsai	2017	Taiwan	RC	2010-2016	1	16	Patients with snakebites who were admitted to the ED and NF	NR	Surgically confirmed	Operative	64.7	NR	Full body	NS	0	NR	NR	Time presentation to surgery Total: Mean 5.31h (n = 16)	NR	0	0	NR	Time presentation to surgery Total: Mean 5.31h (n = 16)
Tuncel	2006	Turkey	NR	2002-2005	1	20	Patients treated for FG	NR	NR	NR	63.5	NR	Fournier	NS	30% (6/20)	Time onset symptoms to admission Total: Median 5.8 days (n = 20) Survived: Mean 4.0 ± 1.3 days (n = 14) Deceased: Mean 4.8 ± 1.4 days (n = 6) (p = 0.134)	NR	NR	NR	NA	NA	NA	NA
Ugwumba	2012	Nigeria	NR	1995-2008	1	28	Patients treated for FG who had complete records	NR	The diagnosis of FG was made on clinical grounds after a detailed history and physical examination	Clinical Signs	48.3	NR	Fournier	NS	3.6% (1/28)	Time onset symptoms to presentation Total: Mean 7.5 days (range 3 -14) (n = 28) <72h: Total 10.7% (3/28) 72-144h: Total 28.6% (8/28) >144h: Total 60.7% (17/28)	NR	NR	NR	NA	NA	NA	NA
Ullah	2009	Pakistan	PC	2002-2007	3	60	Male and female patients of any age group diagnosed with FG	NR	NR	NR	47 ± 17.4	NR	Fournier	NS	6.67% (4/60)	NR	Time onset symptoms to surgery Total: Mean 2.5 days (range 1 - 7) (n = 60)	NR	NR	NA	NA	NA	NA
Vayvada	2012	Turkey	NR	2000-2010	1	30	Patients with NF localized in central parts of the body	NR	NR	NR	54.03	NR	Trunk + Fournier	NS	20% (6/30)	Time onset symptoms to diagnosis Total: Mean 6 days (range 2 - 11) (n = 30)	NR	NR	NR	NA	NA	NA	NA
Verma	2012	India	RC	2009-2011	3	95	Patients identified as having FG	We excluded patients with periurethral and scrotal abscesses if there was no evidence of extension to soft-tissue or necrosis	FG diagnosis was established on clinical basis	Clinical signs	46.5 ± 15.6	NR	Fournier	NS	27.4% (26/95)	Time onset symptoms to presentation Total: Mean 7.2 days (n = 95) Survived: Mean 6.4 days (range 2 - 15) (n = 69) Deceased: Mean 9.5 days (range 1 - 19) (n = 26) >48h: 68.4% (65/95), 75% of the survivors (52/69) and 52.9% of the deceased (13/26) (p < 0.05)	NR	Time admission to surgery <8h: Total 86.7% (82/95)	NR	NA	NA	NA	NA
Wang	2012	China	RC	1996-2011	1	24	Patients with FG	NR	Clinical diagnoses were based on the clinical profile, physical examination, laboratory data, and signs and symptoms on admission in accordance with the diagnostic criteria for NF by Fisher et al.	Operative	48.3	NR	Fournier	NS	20.8% (5/24)	Time onset symptoms to presentation Total: Median 5.58 days (range 1 - 12) (n = 24) Survived: Mean 4.52 ± 1.98 days (n = 19) Deceased: Mean 9.6 ± 1.82 days (n = 5) (p <0.05)	NR	NR	NR	NA	NA	NA	NA
Wolf	2009	Denmark	RC	2002-2009	1	17	Patients registered with the International Statistical Classification of Diseases and Related Health Problems (ICD) ICD3 code DM725 A	NR	NR	NR	NR	54	Head/Neck	NS	0	NR	NR	Time diagnosis to surgery <24h: Total 88% (15/17) 24-48h: Total 12% (2/17)	NR	NA	NA	NA	NA
Wong	2003	Singapore	RC	1997-2002	1	89	All patients who had been diagnosed with NF	NR	The presence of grayish necrotic fascia, demonstration of a lack of resistance of normally adherent muscular fascia to blunt dissection, lack of bleeding of the fascia during dissection, and the presence of foul-smelling "dish water" pus. Permanent histopathological tissue specimens were examined to confirm the diagnosis when available.	Operative, histopathology	56.0	NR	Full body	In-hospital mortality rate (LOHS: mean 40.6 days)	21.3% (19/89)	NR	NR	Time presentation to surgery <24h: cumulative mortality rate 6.8% (95% CI 0.2-13.4) <48h: cumulative mortality rate 24.8% (95% CI 11.6-38.0)	NR	22.5% (20/89)	28.2% (20/71)	NR	NR
Yang	2012	China	RC	2005-2010	1	7	Patients diagnosed and treated for perianal NF with a loose-seton technique	NR	The diagnosis of perianal NF was confirmed by meeting the criteria defined by Fisher et al.	Clinical signs	NR	53	Perianal	NS	0	Time onset symptoms to admission Total: Mean 13 days (n = 7)	NR	NR	NR	NA	NA	NA	NA
Yilmazlar	2007	Turkey	RC	1986-2002	1	67	Patients presenting with NSTIs	NR	NR	NR	54.9 ± 1.73	NR	Full body	NS	49% (33/67)	NR	Time from onset symptoms to treatment Total: Mean 7.0 (n = 67) Survivors: Mean 7.35 days (n = 34) Deceased: Mean 6.58 days (n = 33) (p = 0.351)	NR	NR	3% (2/67)	NR	NR	NR
Yip	2016	Hong Kong	RC	2002-2014	1	137	Patients (≥18) with NF admitted to the ICU	NR	We used surgical criteria including presence of necrotic fascia, lack of resistance of normally muscular fascia to blunt dissection and presence of pus at the fascia level to confirm the definitive diagnosis	Operative	61	NR	Full body	ICU-mortality rate (Lenght of ICU stay: Mean 9.9 days)	42.3% (58/137)	NR	NR	Time presentation to diagnosis Total: Mean 34h ± 96.71 (n = 137) Survived: Mean 25.28h (n = 79) Deceased: Mean 46.12h (n = 58) (p = 0.220) Time diagnosis to surgery Total: mean 3.2h ± 3.71 (n = 137) Survived: mean 2.97h (n = 79) Deceased: mean 3.51 (n = 58) (p = 0.410)	NR	38.7% (53/137)	44.9% (53/118)	NR	Time presentation to diagnosis Total: Mean 34h ± 96.71 (n = 137) Time diagnosis to surgery Total: Mean 3.2h ± 3.71 (n = 137)
Yu	2011	Taiwan	RC	2004-2008	1	65	Patients with a discharge diagnosis of NF of 65 years and older	Patients with suspected diagnosis without surgical treatment and patients who had received prior surgical treatment before being transferred to our hospital	Definitive diagnosis was made with operative findings of massive necrosis, avascular change, or foul purulent discharge of the fascia	Operative	72.97 ± 6.6	NR	Full body	In-hospital mortality rate (LOHS: mean 33.7 days)	32.3% (21/65)	NR	NR	Time admission to surgery Total: Mean 1.6 ± 1.6 days (n = 65) Survived: Mean 1.5h ± 1.5 days (n = 44) Deceased: Mean 1.7 ± 1.9 days (n = 21) (p = 0.59)	NR	9.2% (6/65)	11.5% (6/52)	NR	Time admission to surgery Total: Mean 1.6 ± 1.6 days (n = 65)
